# Supplementary material for: Indoor Air Quality and Bioaerosols in Spanish University Classrooms
Source: MDPI journal article supplement (doi:10.3390/toxics12030227), 2024-03-20
Supplement: s1 [file s1]

## Article

# Indoor Air Quality and Bioaerosols in Spanish University Classrooms

Esther Fuentes-Ferragud <sup>1,2</sup>, Antonio López <sup>1,\*</sup>, Juan Miguel Piera <sup>1</sup>, Vicent Yusa <sup>1,3,4</sup>, Salvador Garrigues <sup>4</sup>, Miguel de la Guardia <sup>4</sup>, F. Xavier López Labrador <sup>1,5,6</sup>, Marisa Camaró <sup>3</sup>, María Ibáñez <sup>2</sup> and Clara Coscollà <sup>1</sup>

- <sup>1</sup> Foundation for the Promotion of Health and Biomedical Research in the Valencia Region, FISABIO-Public Health, 21, Avenida Catalunya, 46020 Valencia, Spain; esther.fuentes@fisabio.es (E.F.-F.); al314087@uji.es (J.M.P.); vicent.yusa@fisabio.es (V.Y.); f.xavier.lopez@uv.es (F.X.L.L.); clara.coscolla@fisabio.es (C.C.)
- <sup>2</sup> Environmental and Public Health Analytical Chemistry, Research Institute for Pesticides and Water, University Jaume I, S/N, Avenida Sos Baynat, 12071 Castelló de la Plana, Spain; ibanezm@uji.es
- <sup>3</sup> Public Health Laboratory of Valencia, 21, Avenida Catalunya, 46020 Valencia, Spain; camaro\_mar@gva.es
- <sup>4</sup> Analytical Chemistry Department, University of Valencia, Edifici Jeroni Muñoz, Dr. Moliner 50, 46100 Burjassot, Spain; salvador.garrigues@uv.es (S.G.); miguel.delaguardia@uv.es (M.d.l.G.)
- <sup>5</sup> Microbiology Department, University of Valencia Medical School, Av. de Blasco Ibáñez, 13, 46010 Valencia, Spain
- <sup>6</sup> CIBERESP, Institute of Health Carlos III, Sinsesio Delgado Street, 4, 28029 Madrid, Spain
- \* Correspondence: antonio.lopez@fisabio.es; Tel.: +34-961-925-900

## Table of Contents

| Type        | Captions                                                             | Page |
|-------------|----------------------------------------------------------------------|------|
| Table S1    | Sensor specifications                                                | 3    |
| Table S2    | Field work manual                                                    | 4    |
| Table S3    | Results of respiratory viruses in indoor air                         | 6    |
| Table S4    | List of the tentatively identified substances in indoor air          | 7    |
| Table S5    | List of the tentatively identified substances in outdoor air         | 10   |
| Figure S1   | CO concentration (ppm) in classroom 1                                | 19   |
| Figure S2   | CO concentration (ppm) in classroom 2                                | 20   |
| Figure S3   | CO concentration (ppm) in classroom 3                                | 21   |
| Figure S4   | CO <sub>2</sub> concentration (ppm) in classroom 1                   | 22   |
| Figure S5   | CO <sub>2</sub> concentration (ppm) in classroom 2                   | 23   |
| Figure S6   | CO <sub>2</sub> concentration (ppm) in classroom 3                   | 24   |
| Figure S7   | HCHO concentration (mg m <sup>-3</sup> ) in classroom 1              | 25   |
| Figure S8   | HCHO concentration (mg m <sup>-3</sup> ) in classroom 2              | 26   |
| Figure S9   | NO <sub>2</sub> concentration (ppm) in classroom 1                   | 27   |
| Figure S10  | NO <sub>2</sub> concentration (ppm) in classroom 2                   | 28   |
| Figure S11  | NO <sub>2</sub> concentration (ppm) in classroom 3                   | 29   |
| Figure S12  | PM <sub>10</sub> concentration (mg m <sup>-3</sup> ) in classroom 1  | 30   |
| Figure S13  | PM <sub>10</sub> concentration (mg m <sup>-3</sup> ) in classroom 2  | 31   |
| Figure S14  | PM <sub>10</sub> concentration (mg m <sup>-3</sup> ) in classroom 3  | 32   |
| Figure S15  | PM <sub>2.5</sub> concentration (mg m <sup>-3</sup> ) in classroom 1 | 33   |
| Figure S16  | PM <sub>2.5</sub> concentration (mg m <sup>-3</sup> ) in classroom 2 | 34   |
| Figure S17  | PM <sub>2.5</sub> concentration (mg m <sup>-3</sup> ) in classroom 3 | 35   |
| Figure S18  | VOCs concentration (mg m <sup>-3</sup> ) in classroom 1              | 36   |
| Figure S19  | VOCs concentration (mg m <sup>-3</sup> ) in classroom 2              | 37   |
| Figure S20  | VOCs concentration (mg m <sup>-3</sup> ) in classroom 3              | 38   |
| Figure S-21 | Temperature (°C) in classroom 1                                      | 39   |
| Figure S-22 | Temperature (°C) in classroom 2                                      | 40   |
| Figure S-23 | Temperature (°C) in classroom 3                                      | 41   |
| Figure S-24 | Relative Humidity (%) in classroom 1                                 | 42   |
| Figure S-25 | Relative Humidity (%) in classroom 2                                 | 43   |
| Figure S-26 | Relative Humidity (%) in classroom 3                                 | 44   |

Table S1. Sensor specifications.

| Gas             | Sensor type       | Work range (ppm)            | Detection limit (ppm)   | Resolution (ppm)        | Operating conditions |        |
|-----------------|-------------------|-----------------------------|-------------------------|-------------------------|----------------------|--------|
|                 |                   |                             |                         |                         | Temp (°C)            | RH (%) |
| CO              | GSE <sup>1</sup>  | 0-100                       | 0.2                     | 0.1                     | 0-40                 | 15-90  |
| CO <sub>2</sub> | NDIR <sup>2</sup> | 0-5000                      | 10                      | 1                       | 0-40                 | 0-95   |
| HCHO            | GSE <sup>1</sup>  | 0-10                        | 0.01                    | 0.01                    | 0-40                 | 15-90  |
| NO <sub>2</sub> | GSE <sup>1</sup>  | 0-1                         | 0.005                   | 0.001                   | 0-40                 | 15-90  |
| PM              | LPC <sup>4</sup>  | 0.001-1.0 mg/m <sup>3</sup> | 0.001 mg/m <sup>3</sup> | 0.001 mg/m <sup>3</sup> | 0-40                 | 0-90   |
| VOCs            | PID <sup>3</sup>  | 0-20                        | 0.1                     | 0.1                     | 0-40                 | 10-90  |
| O <sub>3</sub>  | GSE <sup>1</sup>  | 0-10                        | 0.01                    | 0.01                    | 0-40                 | 15-90  |

<sup>1</sup> GSE—gas-sensitive electrochemical, <sup>2</sup> NDIR—non-dispersive infra-red, <sup>3</sup> pID—photo ionisation detector, <sup>4</sup> LPC—laser particle counter

Table S2. Field work manual.

---

**Recruitment, informed consent and questionnaires**


---

When the students arrived at the arranged date, and before the first lesson, the researchers gave a talk to explain the objectives of the project to them and invited them and the teacher to participate in the study by donating saliva samples. They also remarked that voluntary participation is a legal requirement in this type of study.

The researchers explained and distributed to the recruited volunteers the following documents: i) an information document for the participant, ii) the informed consent, which was mandatory, had to be signed and included information about requesting consent for the storage of any excess of biological samples in the Biobank for Biomedical Research in Public Health of the Community of Valencia, iii) the procedure and guide for saliva auto-sampling, and iv) questionnaires.

The questionnaires were divided into three sections as follows: a) the general information of the participants, such as personal information and socio-demographic characteristics; b) viral preventive and protective measures; and c) air quality perception by the donors. The questionnaires were self-filled by the participants during the break time of the sampling days.

With regards to the protection of the data obtained in this study, this should be in accordance with the current standards on data protection, and participants should be informed of their use. The participants were informed that the information would be published only in scientific journals and would not include any personal details.

---

**Air and bioaerosol sampling procedure**


---

To carry out the sampling, the following requirements had to be met:

- The samples had to be taken under normal conditions of a class day.
  - The equipment had to be placed and connected before the beginning of the classes and turned off (if necessary) at the end of these classes so as not to interfere with the attendees.
  - The sensors had to be placed spaced around the class without interfering with the attendees. They had to be at a similar height to that of the people attending (between 1.5 and 1.7 m) to achieve more realistic results.
-

- The bioaerosols sampler was placed on the tables among the students. If it was necessary to change the filters during sampling, the said equipment was placed in an easily accessible place so it was as unnoticed as possible during the change.

---

### **Saliva sampling procedure**

---

- Before the start of the class, information sheets, questionnaires, sample-taking guides, consent, and the necessary material for taking samples were left on the participant's tables.
- At the beginning of the class's day, there was an explanatory talk about the project to students and teachers, and they were invited to participate voluntarily by donating saliva.
- Information sheets, questionnaires, sample-taking guides, consent to carry out the corresponding analyses, and the storage of samples and the material necessary for taking samples were provided to the participants.
- Whoever wanted to participate completed the questionnaires, signed the consent form, and was able to revoke the storage or use of their sample at any time with a revocation document.
- Sampling was carried out, as explained in Figure 2, during the break or at the end of the classes.

---

### **Transport and storage of environmental and biological samples**

---

Air and biological samples correctly labelled were kept at 4°C in a portable refrigerator, stored zip bags, and in a triple container (UN 3373, Category 3 Biological Substance). Biological samples were transported to the laboratory and analysed within 24 hours of their collection. The excess saliva samples were taken to the Valencian Biobank upon signed informed consent, and they were stored at -80°C.

---

**Table S3.** Results of respiratory viruses in indoor air.

[illegible]

**Table S4.** List of the tentatively identified substances in indoor air.

| Compound name                                                | Molecular formula                                | Toxicological concern | Uses, ApplicationsOrigins |
|--------------------------------------------------------------|--------------------------------------------------|-----------------------|---------------------------|
| 1-(Carboxymethyl)cyclohexanecarboxylic acid                  | C <sub>9</sub> H <sub>14</sub> O <sub>4</sub>    | Low                   | Medicine                  |
| 2H-Pyran-2-methanol, tetrahydro-                             | C <sub>6</sub> H <sub>12</sub> O <sub>2</sub>    | High                  | Others                    |
| 2-Methylbenzoic acid                                         | C <sub>8</sub> H <sub>8</sub> O <sub>2</sub>     | Low                   | Industrial                |
| 2-Nonanone, 3-(hydroxymethyl)-                               | C <sub>10</sub> H <sub>20</sub> O <sub>2</sub>   | Intermediate          | Industrial                |
| 2-Pentanone, 4-hydroxy-4-methyl-                             | C <sub>6</sub> H <sub>12</sub> O <sub>2</sub>    | High                  | Industrial                |
| 2-pentylfuran                                                | C <sub>9</sub> H <sub>14</sub> O                 | High                  | Cosmetic/Industrial       |
| 2-Propanol, 1-(2-methoxypropoxy)-                            | C <sub>7</sub> H <sub>16</sub> O <sub>3</sub>    | High                  | Others                    |
| 3-(4-Isopropylphenyl)-2-methylpropionaldehyde                | C <sub>13</sub> H <sub>18</sub> O                | Low                   | Industrial                |
| 3-Acetyl-2,5-dimethyl furan                                  | C <sub>8</sub> H <sub>10</sub> O <sub>2</sub>    | High                  | Industrial/food           |
| 3-Methyladipic acid                                          | C <sub>7</sub> H <sub>12</sub> O <sub>4</sub>    | Low                   | Biological                |
| 4H-Inden-4-one, 1,2,3,5,6,7-hexahydro-1,1,2,3,3-pentamethyl- | C <sub>14</sub> H <sub>22</sub> O                | High                  | Cosmetics                 |
| Amylcinnamaldehyde                                           | C <sub>14</sub> H <sub>18</sub> O                | Low                   | Cosmetics                 |
| Amyl salicylate                                              | C <sub>12</sub> H <sub>16</sub> O <sub>3</sub>   | Low                   | Cosmetics                 |
| Benzene, (1-methyldecyl)- [2-phenylundecane]                 | C <sub>17</sub> H <sub>28</sub>                  | Low                   | Natural product           |
| Benzene, 1,2,3,5-tetramethyl- [isodurene]                    | C <sub>10</sub> H <sub>14</sub>                  | Low                   | Industrial                |
| Benzene, 1,3-dimethyl- [m-xylene]                            | C <sub>8</sub> H <sub>10</sub>                   | Low                   | Industrial                |
| Benzene, 1-methyl-4-propyl- (toluene)                        | C <sub>10</sub> H <sub>14</sub>                  | Low                   | Industrial                |
| Benzophenone                                                 | C <sub>13</sub> H <sub>10</sub> O                | High                  | Industrial                |
| Betaine                                                      | C <sub>5</sub> H <sub>11</sub> NO <sub>2</sub>   | Low                   | Medicine/Industrial       |
| Beta-pinene                                                  | C <sub>10</sub> H <sub>16</sub>                  | Low                   | Wooden building materials |
| Bis(2-ethylhexyl) amine                                      | C <sub>16</sub> H <sub>35</sub> N                | High                  | Industrial                |
| Borneol                                                      | C <sub>10</sub> H <sub>18</sub> O                | Low                   | Medicine                  |
| Camphor                                                      | C <sub>10</sub> H <sub>16</sub> O                | High                  | Wooden building materials |
| CAPSO                                                        | C <sub>9</sub> H <sub>19</sub> NO <sub>4</sub> S | Low                   | Industrial                |
| Cyclohexene,1-propyl-                                        | C <sub>9</sub> H <sub>16</sub>                   | Low                   | Natural product           |

|                                                                       |                                                 |              |                        |
|-----------------------------------------------------------------------|-------------------------------------------------|--------------|------------------------|
| Cyclopent-2-ene-1-carboxylic acid, 2,3-dimethyl-1-ethyl-, ethyl ester | C <sub>12</sub> H <sub>20</sub> O <sub>2</sub>  | Low          | Pesticide              |
| DEET                                                                  | C <sub>12</sub> H <sub>17</sub> NO              | Low          | Pesticide              |
| Diethyl phthalate                                                     | C <sub>12</sub> H <sub>14</sub> O <sub>4</sub>  | Low          | Cosmetics/Industrial   |
| Ethyl palmitate                                                       | C <sub>18</sub> H <sub>36</sub> O <sub>2</sub>  | Low          | Industrial             |
| Formamide, N,N-dibutyl-                                               | C <sub>9</sub> H <sub>19</sub> NO               | High         | Industrial             |
| Glutaric acid                                                         | C <sub>5</sub> H <sub>8</sub> O <sub>4</sub>    | Low          | Industrial             |
| Hexadecanamide                                                        | C <sub>16</sub> H <sub>33</sub> NO              | High         | Industrial             |
| Indane                                                                | C <sub>9</sub> H <sub>10</sub>                  | High         | Industrial             |
| Linalool                                                              | C <sub>10</sub> H <sub>18</sub> O               | High         | Industrial/insecticide |
| Limonene                                                              | C <sub>10</sub> H <sub>16</sub>                 | Low          | Cosmetics              |
| Limonene-oxide                                                        | C <sub>10</sub> H <sub>16</sub> O               | High         | Industrial             |
| Menthol                                                               | C <sub>10</sub> H <sub>20</sub> O               | Low          | Cosmetics/medicine     |
| Methylsuccinic acid                                                   | C <sub>5</sub> H <sub>8</sub> O <sub>4</sub>    | Low          | Industrial             |
| Napthalene                                                            | C <sub>10</sub> H <sub>8</sub>                  | High         | Industrial             |
| Naphthalene, 1-methoxy-                                               | C <sub>11</sub> H <sub>10</sub> O               | High         | Others                 |
| Naphthalene, 2-methyl-                                                | C <sub>11</sub> H <sub>10</sub>                 | High         | Industrial             |
| n-hexyl salicylate                                                    | C <sub>13</sub> H <sub>18</sub> O <sub>3</sub>  | Low          | Industrial             |
| N-Isovalerylglycine                                                   | C <sub>7</sub> H <sub>13</sub> NO <sub>3</sub>  | High         | Biological             |
| N,N-Dibutyl-formamide                                                 | C <sub>9</sub> H <sub>19</sub> NO               | High         | Industrial             |
| NP-014287                                                             | C <sub>18</sub> H <sub>32</sub> O <sub>3</sub>  | Intermediate | Industrial             |
| NP-018661                                                             | C <sub>8</sub> H <sub>16</sub> O <sub>3</sub>   |              |                        |
| NP-018716                                                             | C <sub>11</sub> H <sub>20</sub> O <sub>4</sub>  | Low          | Other                  |
| NP-020206                                                             | C <sub>11</sub> H <sub>16</sub> O <sub>4</sub>  | Low          | Industrial             |
| Octan-2-yl-palmitate                                                  | C <sub>24</sub> H <sub>48</sub> O <sub>2</sub>  | High         | Cosmetic/Industrial    |
| p-Cymene                                                              | C <sub>10</sub> H <sub>14</sub>                 | Low          | Industrial             |
| Phenol, 2,6-bis(1,1-dimethylethyl)-4-methyl-, methylcarbamate         | C <sub>17</sub> H <sub>27</sub> NO <sub>2</sub> | Intermediate | Cosmetics              |
| Pentanoic acid, 2-hydroxy-4-methyl-, methyl ester                     | C <sub>7</sub> H <sub>14</sub> O <sub>3</sub>   | Low          | Others                 |
| Pimelic acid                                                          | C <sub>7</sub> H <sub>12</sub> O <sub>4</sub>   | Low          | Other                  |



|                                                                              |                                                               |              |               |
|------------------------------------------------------------------------------|---------------------------------------------------------------|--------------|---------------|
| Pregabalin                                                                   | C <sub>8</sub> H <sub>17</sub> NO <sub>2</sub>                | Low          | Medicine/Drug |
| Propanoic acid, 2-methyl-, 3-hydroxy-2,2,4-trimethylpentyl ester             | C <sub>12</sub> H <sub>24</sub> O <sub>3</sub>                | Intermediate | Industrial    |
| Pyrimidine-2,4,6-trione, 1-butyl-5-[(2-piperazin-1-yl-ethylamino)methylene]- | C <sub>15</sub> H <sub>25</sub> N <sub>5</sub> O <sub>3</sub> | High         | Others        |
| Quinazoline-2,4-diol                                                         | C <sub>8</sub> H <sub>6</sub> N <sub>2</sub> O <sub>2</sub>   | High         | Industrial    |
| Sorbic acid                                                                  | C <sub>6</sub> H <sub>8</sub> O <sub>2</sub>                  | Low          | Industrial    |
| Squalene                                                                     | C <sub>30</sub> H <sub>50</sub>                               | Low          | Cosmetics     |
| Suberic acid                                                                 | C <sub>8</sub> H <sub>14</sub> O <sub>4</sub>                 | Low          | Industrial    |
| Tributyl acetylcitrate                                                       | C <sub>20</sub> H <sub>34</sub> O <sub>8</sub>                | Low          | Industrial    |
| Triethyl phosphate                                                           | C <sub>6</sub> H <sub>15</sub> O <sub>4</sub> P               | High         | Industrial    |
| Tropine                                                                      | C <sub>8</sub> H <sub>15</sub> NO                             | High         | Medicine      |
| Urocanic acid                                                                | C <sub>6</sub> H <sub>6</sub> N <sub>2</sub> O <sub>2</sub>   | Low          | Medicine      |
| Vanillin                                                                     | C <sub>8</sub> H <sub>8</sub> O <sub>3</sub>                  | Low          | Industrial    |

Table S5. List of the tentatively identified substances in outdoor air.

| Compound name                                                                                                       | Molecular formula                                                 | Toxicological concern | Uses, applications, or origins |
|---------------------------------------------------------------------------------------------------------------------|-------------------------------------------------------------------|-----------------------|--------------------------------|
| (-)-Camphanic acid                                                                                                  | C <sub>10</sub> H <sub>14</sub> O <sub>4</sub>                    | High                  | Industrial                     |
| (2R,5R,6R)-3-[(1E,3E)-hepta-1,3-dien-1-yl]-5,6-dihydroxy-2-(hydroxymethyl)cyclohexan-1-one                          | C <sub>14</sub> H <sub>22</sub> O <sub>4</sub>                    |                       |                                |
| 1-(3-Hydroxypropyl)-2-piperidinone                                                                                  | C <sub>8</sub> H <sub>15</sub> NO <sub>2</sub>                    | High                  | Others                         |
| 1-(tert-butyldimethylsilyl)-3-ethyl-4-isopropyl-1H-pyrrole-2,5-dione                                                | C <sub>15</sub> H <sub>27</sub> NO <sub>2</sub> Si                |                       |                                |
| 1,12-Dodecanediol                                                                                                   | C <sub>12</sub> H <sub>26</sub> O <sub>2</sub>                    | Low                   | Industrial                     |
| 1,2,3,4-Tetrahydroisoquinolin-6-ol, 1-[3-hydroxybenzyl]-                                                            | C <sub>16</sub> H <sub>17</sub> NO <sub>2</sub>                   | High                  | Others                         |
| 1,2,4-Oxadiazol-5-amine,<br>3-[4-(cyclopropylamino)-1,2,5-oxadiazol-3-yl]-N-[(4-methoxyphenyl)methyl]-              | C <sub>15</sub> H <sub>16</sub> N <sub>6</sub> O <sub>3</sub>     | High                  | Others                         |
| 1,2-Benzenediol, o-(1-adamantanecarbonyl)-                                                                          | C <sub>17</sub> H <sub>20</sub> O <sub>3</sub>                    | Low                   | Others                         |
| 1,2-Benzenediol, O,O'-di(4-ethylbenzoyl)-                                                                           | C <sub>24</sub> H <sub>22</sub> O <sub>4</sub>                    | Low                   | Others                         |
| 1,3-Benzenedicarboxylic acid, bis(2-ethylhexyl) ester                                                               | C <sub>24</sub> H <sub>38</sub> O <sub>4</sub>                    | Low                   | Industrial                     |
| 1,3-Benzothiazol-2(3H)-one, 3-(3,3-dimethyl-1-oxobutyl)-                                                            | C <sub>13</sub> H <sub>15</sub> NO <sub>2</sub> S                 | High                  | Others                         |
| 1,3-Benzoxazole-7-carboxylic acid, 2-methyl-, 4-nitrophenyl ester                                                   | C <sub>15</sub> H <sub>10</sub> N <sub>2</sub> O <sub>5</sub>     | High                  | Others                         |
| 1,3-Bis(cinnamoyloxymethyl)adamantane                                                                               | C <sub>30</sub> H <sub>32</sub> O <sub>4</sub>                    | High                  | Others                         |
| 1,3-Di(2-benzothiazolyl)-1,3-bis(mercaptomethyl)-urea                                                               | C <sub>17</sub> H <sub>14</sub> N <sub>4</sub> OS <sub>4</sub>    | High                  | Others                         |
| 1,3-Dimethyl-5-propyl-7-(propene-1-yl)adamantane                                                                    | C <sub>18</sub> H <sub>30</sub>                                   | High                  | Others                         |
| 1,3-Dioxan-4-one, 2-(1,1-dimethylethyl)-5,6-dimethyl-5-(phenylmethyl)-, [2R-(2 $\alpha$ ,5 $\alpha$ ,6 $\alpha$ )]- | C <sub>17</sub> H <sub>24</sub> O <sub>3</sub>                    | High                  | Others                         |
| 1,3-Diphenyltriacetin                                                                                               | C <sub>21</sub> H <sub>22</sub> O <sub>6</sub>                    | High                  | Pesticide                      |
| 1,3-Pentanedione, 4,4-dimethyl-1-phenyl-                                                                            | C <sub>13</sub> H <sub>16</sub> O <sub>2</sub>                    | Low                   | Others                         |
| 1,4,7,-Cycloundecatriene, 1,5,9,9-tetramethyl-, Z,Z,Z,-                                                             | C <sub>15</sub> H <sub>24</sub>                                   | Low                   | Others                         |
| 1,5-Pentanediol, O,O'-di(2-trifluoromethylbenzoyl)-                                                                 | C <sub>21</sub> H <sub>18</sub> F <sub>6</sub> O <sub>4</sub>     | High                  | Others                         |
| 1,8,15,22-Tricosatetrayne                                                                                           | C <sub>23</sub> H <sub>32</sub>                                   | High                  | Others                         |
| 1,9-Dioxa-4,12-diazadispiro[4.2.4.2]tetradecane, 3,3,11,11-tetramethyl-                                             | C <sub>14</sub> H <sub>26</sub> N <sub>2</sub> O <sub>2</sub>     | High                  | Others                         |
| 1-[5-(2-Chloro-phenyl)-2-thioxo-[1,3,4]oxadiazol-3-ylmethyl]-piperidine-4-carboxylic acid ethyl ester               | C <sub>17</sub> H <sub>20</sub> ClN <sub>3</sub> O <sub>3</sub> S | High                  | Others                         |

|                                                                                                    |                                                                 |      |                              |
|----------------------------------------------------------------------------------------------------|-----------------------------------------------------------------|------|------------------------------|
| 13-Docosenamide, (Z)-                                                                              | C <sub>22</sub> H <sub>43</sub> NO                              | High | Industrial                   |
| 1-(Carboxymethyl)cyclohexanecarboxylic acid                                                        | C <sub>9</sub> H <sub>14</sub> O <sub>4</sub>                   | Low  | Medicine                     |
| 1-Eicosanol                                                                                        | C <sub>20</sub> H <sub>42</sub> O                               | Low  | Cosmetics                    |
| 1H-Cycloprop[e]azulene, 1a,2,3,4,4a,5,6,7b-octahydro-1,1,4,7-tetramethyl-, [1aR-(1aα,4a,4aβ,7bα)]- | C <sub>15</sub> H <sub>24</sub>                                 | Low  | Cosmetics                    |
| 1-Isopropenyl-2,3-dihydro-1H-benzo[d]imidazol-2-one                                                | C <sub>10</sub> H <sub>10</sub> N <sub>2</sub> O                | High | Other                        |
| 1-Methoxymethyl-1H-benzotriazole                                                                   | C <sub>8</sub> H <sub>9</sub> N <sub>3</sub> O                  | High | Industrial                   |
| 1-Methylnicotinamide                                                                               | C <sub>7</sub> H <sub>8</sub> N <sub>2</sub> O                  | Low  | Cosmetic                     |
| 1-Nonen-3-one, 1-(4-chlorophenyl)-                                                                 | C <sub>15</sub> H <sub>19</sub> ClO                             | High | Others                       |
| 1-oxo-2,3-dihydro-1H-inden-4-yl benzoate                                                           | C <sub>16</sub> H <sub>12</sub> O <sub>3</sub>                  | High | Other                        |
| 1-Phenyl-2-butanone                                                                                | C <sub>10</sub> H <sub>12</sub> O                               | Low  | Industrial                   |
| 1-Propanol, 2-(2-methoxypropoxy)-                                                                  | C <sub>7</sub> H <sub>16</sub> O <sub>3</sub>                   | High | Others                       |
| 2-(2-methoxyethoxy)ethyl 1-phenylcyclopentane-1-carboxylate                                        | C <sub>17</sub> H <sub>24</sub> O <sub>4</sub>                  |      |                              |
| 2-(3,4-Dihydro-5-hydroxy-2-methyl)-2H-1-benzopyranethanol                                          | C <sub>13</sub> H <sub>20</sub> O <sub>2</sub>                  | High | Others                       |
| 2(5H)-Furanone, 4-methyl-5,5-bis(2-methyl-2-propenyl)-                                             | C <sub>13</sub> H <sub>18</sub> O <sub>2</sub>                  | High | Others                       |
| 2-(Benzylidenehydrazino)-2-oxo-N-(1-phenylethyl)acetamide                                          | C <sub>17</sub> H <sub>17</sub> N <sub>3</sub> O <sub>2</sub>   | High | Others                       |
| 2-(Octanoyloxy)propane-1,3-diyl bis(decanoate)                                                     | C <sub>31</sub> H <sub>58</sub> O <sub>6</sub>                  | Low  | Others                       |
| 2,2,3,3,3-Pentafluoro-N-[1-(2-methoxyphenyl)-1-oxopropan-2-yl]-N-methylpropanamide                 | C <sub>14</sub> H <sub>14</sub> F <sub>5</sub> NO <sub>3</sub>  | High | Industrial                   |
| 2,2-dimethyl-N-(4-pyridinyl)propanamide                                                            | C <sub>10</sub> H <sub>14</sub> N <sub>2</sub> O                | High | Other                        |
| 2,3-Dihydro-1-benzofuran-2-carboxylic acid                                                         | C <sub>9</sub> H <sub>8</sub> O <sub>3</sub>                    | High | Other                        |
| 2,4-Dinitrophenol                                                                                  | C <sub>6</sub> H <sub>4</sub> N <sub>2</sub> O <sub>5</sub>     | High | Pesticide/Antibacterial drug |
| 2,5-di-tert-Butylhydroquinone                                                                      | C <sub>14</sub> H <sub>22</sub> O <sub>2</sub>                  | Low  | Industrial                   |
| 2,5-Pyrrolidinedione, 1-[(4-methylbenzoyl)oxy]-                                                    | C <sub>12</sub> H <sub>11</sub> NO <sub>4</sub>                 | High | Industrial                   |
| 23-Norcona-5,18(22)-dienin-3-amine, N-methyl-, (3β)-                                               | C <sub>22</sub> H <sub>34</sub> N <sub>2</sub>                  | High | Others                       |
| 2-Amino-3-methoxybenzoic acid                                                                      | C <sub>8</sub> H <sub>9</sub> NO <sub>3</sub>                   | Low  | Medicine                     |
| 2-Cyclohexene-1,4-dione, 5,6-dichloro-2,3-dimethyl-, 1-oxime, o-benzoyl-                           | C <sub>15</sub> H <sub>13</sub> Cl <sub>2</sub> NO <sub>3</sub> | -    | Others                       |
| 2-Ethylhexanoic acid                                                                               | C <sub>8</sub> H <sub>16</sub> O <sub>2</sub>                   | Low  | Industrial                   |
| 2-Furancarboxylic acid, 1-cyclopentylethyl ester                                                   | C <sub>12</sub> H <sub>16</sub> O <sub>3</sub>                  | High | Others                       |
| 2-Furoylglycine                                                                                    | C <sub>7</sub> H <sub>7</sub> NO <sub>4</sub>                   | High | Industrial                   |

|                                                                                                                  |                                                               |              |                     |
|------------------------------------------------------------------------------------------------------------------|---------------------------------------------------------------|--------------|---------------------|
| 2-Hydroxy-4-(4-hydroxyphenyl)butanoic acid                                                                       | C <sub>10</sub> H <sub>12</sub> O <sub>4</sub>                | Intermediate | Other               |
| 2-Hydroxycaproic acid                                                                                            | C <sub>6</sub> H <sub>12</sub> O <sub>3</sub>                 | Intermediate | Medicine            |
| 2H-1-Benzothiocin-3-methanol,<br>3,4,5,6-tetrahydro-6-hydroxy-3,5,5-trimethyl- $\alpha$ -[2-(methylthio)phenyl]- | C <sub>22</sub> H <sub>28</sub> O <sub>2</sub> S <sub>2</sub> |              |                     |
| 2-Methylbenzhydrol, acetate                                                                                      | C <sub>16</sub> H <sub>16</sub> O <sub>2</sub>                |              |                     |
| 2-Methylbenzoic acid                                                                                             | C <sub>8</sub> H <sub>8</sub> O <sub>2</sub>                  | Low          | Industrial          |
| 2-methyl-5-nitro-1H-indole                                                                                       | C <sub>9</sub> H <sub>8</sub> N <sub>2</sub> O <sub>2</sub>   | High         | Industrial          |
| 2-Phenylacetohydrazide                                                                                           | C <sub>8</sub> H <sub>10</sub> N <sub>2</sub> O               | Low          | Industrial          |
| 2-Propenal, 3-(2,2,6-trimethyl-7-oxabicyclo[4.1.0]hept-1-yl)-                                                    | C <sub>12</sub> H <sub>18</sub> O <sub>2</sub>                | High         |                     |
| 2-tert-Butylphenol, tert-butyldimethylsilyl ether                                                                | C <sub>16</sub> H <sub>28</sub> OSi                           |              |                     |
| 2-tert-Butyl-4-ethylphenol                                                                                       | C <sub>12</sub> H <sub>18</sub> O                             | Low          | Other               |
| 3-(2-Hydroxyethyl)indole                                                                                         | C <sub>10</sub> H <sub>11</sub> NO                            | High         | Sedative/Industrial |
| 3-(3,4-Dimethoxyphenyl)lactic acid, ethyl ester, TMS                                                             | C <sub>16</sub> H <sub>26</sub> O <sub>5</sub> Si             | High         | Others              |
| 3-(3,7-Dimethyl-octa-2,6-dienyl)-4-hydroxy-benzaldehyde                                                          | C <sub>17</sub> H <sub>22</sub> O <sub>2</sub>                | Low          | Others              |
| 3,4-Dimethylbenzoic acid                                                                                         | C <sub>9</sub> H <sub>10</sub> O <sub>2</sub>                 | Low          | Other               |
| 3,4-Dimethoxybenzoylformic acid, TMS                                                                             | C <sub>13</sub> H <sub>18</sub> O <sub>5</sub> Si             | High         | Others              |
| 3,5-di-tert-Butyl-4-hydroxybenzaldehyde                                                                          | C <sub>15</sub> H <sub>22</sub> O <sub>2</sub>                | Intermediate | Industrial          |
| 3-Aminosalicylic acid                                                                                            | C <sub>7</sub> H <sub>7</sub> NO <sub>3</sub>                 | Low          | Drug                |
| 3-Butylisobenzofuran-1(3H)-one                                                                                   | C <sub>12</sub> H <sub>14</sub> O <sub>2</sub>                | High         | Medicine            |
| 3-Hydroxy-3-(2-oxocyclohexyl)-2-indolinone                                                                       | C <sub>14</sub> H <sub>15</sub> NO <sub>3</sub>               | High         | Others              |
| 3-Hydroxyphenylacetic acid                                                                                       | C <sub>8</sub> H <sub>8</sub> O <sub>3</sub>                  | Low          | Medicine            |
| 3-Hydroxyvaleric acid                                                                                            | C <sub>5</sub> H <sub>10</sub> O <sub>3</sub>                 | Intermediate | Other               |
| 3-Methyl-2-quinoxalinol                                                                                          | C <sub>9</sub> H <sub>8</sub> N <sub>2</sub> O                | High         | Industrial          |
| 3-Methylbutyl 4-(dimethylamino)benzoate                                                                          | C <sub>14</sub> H <sub>21</sub> NO <sub>2</sub>               | Low          | Cosmetics           |
| 3-Methoxyphenylacetic acid                                                                                       | C <sub>9</sub> H <sub>10</sub> O <sub>3</sub>                 | Low          | Other               |
| 3-Phenyl-3-pentanol                                                                                              | C <sub>11</sub> H <sub>16</sub> O                             | Low          | Industrial          |
| 4-(N-Methyl-N-methoxy)indancarboxamide                                                                           | C <sub>12</sub> H <sub>15</sub> NO <sub>2</sub>               | Low          | Others              |
| 4,8,12,16-tetraoxaeicosan-1-ol                                                                                   | C <sub>16</sub> H <sub>34</sub> O <sub>5</sub>                | Low          | Others              |

|                                                                                       |                                                                 |      |                      |
|---------------------------------------------------------------------------------------|-----------------------------------------------------------------|------|----------------------|
| 4-Amino-2,6-dimethyl-3-pyridyl 1-adamantanecarboxylate                                | C <sub>18</sub> H <sub>24</sub> N <sub>2</sub> O <sub>2</sub>   | High | Others               |
| 4-Ethylbenzoic acid, 2-methoxyethyl ester                                             | C <sub>12</sub> H <sub>16</sub> O <sub>3</sub>                  | Low  | Others               |
| 4-Ethylbenzoic acid, 2-methylphenyl ester                                             | C <sub>16</sub> H <sub>16</sub> O <sub>2</sub>                  | Low  | Others               |
| 4-Ethylbenzoic acid, cyclobutyl ester                                                 | C <sub>13</sub> H <sub>16</sub> O <sub>2</sub>                  | Low  | Others               |
| 4-Hydroxy-2-methylpyrrolidine-2-carboxylic acid                                       | C <sub>6</sub> H <sub>11</sub> NO <sub>3</sub>                  | High | Industrial           |
| 4-Hydroxybenzaldehyde                                                                 | C <sub>7</sub> H <sub>6</sub> O <sub>2</sub>                    | Low  | Industrial           |
| 4-Methoxycinnamaldehyde                                                               | C <sub>10</sub> H <sub>10</sub> O <sub>2</sub>                  | Low  | Natural              |
| 4-Methoxycinnamic acid                                                                | C <sub>10</sub> H <sub>10</sub> O <sub>3</sub>                  | Low  | Cosmetic/Industrial  |
| 4-Methylumbelliferyl laurate                                                          | C <sub>22</sub> H <sub>30</sub> O <sub>4</sub>                  | High | Others               |
| 4-Nitrocatechol                                                                       | C <sub>6</sub> H <sub>5</sub> NO <sub>4</sub>                   | High | Industrial           |
| 4-Nitrophenol                                                                         | C <sub>6</sub> H <sub>5</sub> NO <sub>3</sub>                   | High | Industrial/Pesticide |
| 4-oxo-5-phenylpentanoic acid                                                          | C <sub>11</sub> H <sub>12</sub> O <sub>3</sub>                  | Low  | Natural              |
| 4-Phenylbutyric acid                                                                  | C <sub>10</sub> H <sub>12</sub> O <sub>2</sub>                  | Low  | Medicine/Industrial  |
| 4-Phenyl-3-buten-2-one                                                                | C <sub>10</sub> H <sub>10</sub> O                               | Low  | Industrial           |
| 4-tert-Butylbenzenethiol, S-acetyl-                                                   | C <sub>12</sub> H <sub>16</sub> OS                              | Low  | Industrial           |
| 5-(2,2-Dimethyl-[1,3]dioxolan-4-yl)-4-(2-hydroxyethyl)-1,2-dimethyl-pyrazolidin-3-one | C <sub>12</sub> H <sub>22</sub> N <sub>2</sub> O <sub>4</sub>   | High | Others               |
| 5,10-Pentadecadien-1-ol, (Z,Z)-                                                       | C <sub>15</sub> H <sub>28</sub> O                               | Low  | Others               |
| 5,7a-Didehydroindicine pertrimethylsilyl ether                                        | C <sub>24</sub> H <sub>47</sub> NO <sub>5</sub> Si <sub>3</sub> | High | Others               |
| 5-Hydroxytryptophan                                                                   | C <sub>11</sub> H <sub>12</sub> N <sub>2</sub> O <sub>3</sub>   | High | Medicine             |
| 6-(4-phenylpiperazino)hexanoic acid hydrochloride                                     | C <sub>16</sub> H <sub>24</sub> N <sub>2</sub> O <sub>2</sub>   | High | Other                |
| 6-Methoxyquinoline                                                                    | C <sub>10</sub> H <sub>9</sub> NO                               | High | Industrial           |
| 6-Methylquinoline                                                                     | C <sub>10</sub> H <sub>9</sub> N                                | High | Industrial           |
| 7-Oxabicyclo[4.1.0]heptane, 1-methyl-4-(2-methyloxiranyl)-                            | C <sub>10</sub> H <sub>16</sub> O <sub>2</sub>                  | High | Industrial           |
| 8,11-Dimethyl-2,9,10-trioxa-6-azonia-1-boratacyclo[4.3.3.0(1,6)]dodecane              | C <sub>9</sub> H <sub>18</sub> BNO <sub>3</sub>                 |      |                      |
| 8-Heptadecanol, 8-methyl-                                                             | C <sub>18</sub> H <sub>38</sub> O                               | High | Others               |
| Acetamide, 2-phenyl-N-[1-(4-hydroxybenzyl)-1-cyclohexyl]-                             | C <sub>21</sub> H <sub>25</sub> NO <sub>2</sub>                 | High | Others               |
| Acetic acid 2-oxo-2,3-dihydro-1H-benzo[e][1,4]diazepin-3-yl ester                     | C <sub>11</sub> H <sub>10</sub> N <sub>2</sub> O <sub>3</sub>   | High | Others               |
| Adamantane-1-carboxamide, N-(4-methyl-3-furazanyl)-                                   | C <sub>14</sub> H <sub>19</sub> N <sub>3</sub> O <sub>2</sub>   | High | Others               |

|                                                                               |                                                                 |              |            |
|-------------------------------------------------------------------------------|-----------------------------------------------------------------|--------------|------------|
| Adipic acid, di(2-fluorophenyl) ester                                         | C <sub>18</sub> H <sub>16</sub> F <sub>2</sub> O <sub>4</sub>   | High         | Industrial |
| Alanine, N-methyl-N-(2-methoxyethoxycarbonyl)-, isobutyl ester                | C <sub>12</sub> H <sub>23</sub> NO <sub>5</sub>                 | High         | Others     |
| Alloaromadendrene                                                             | C <sub>15</sub> H <sub>24</sub>                                 | Low          | Industrial |
| Alverine                                                                      | C <sub>20</sub> H <sub>27</sub> N                               | High         | Medicine   |
| Arctiol                                                                       | C <sub>15</sub> H <sub>26</sub> O <sub>2</sub>                  | High         | Others     |
| Benzamide, 4-chloro-3-methyl-N-allyl-N-ethyl-                                 | C <sub>13</sub> H <sub>16</sub> ClNO                            |              |            |
| Benzamide, N-(2-chloro-3-pyridyl)-4-ethoxy-                                   | C <sub>14</sub> H <sub>13</sub> ClN <sub>2</sub> O <sub>2</sub> | High         | Others     |
| Benzamide                                                                     | C <sub>7</sub> H <sub>7</sub> NO                                | Low          | Industrial |
| Benzene, (1,1,4,6,6-pentamethylheptyl)-                                       | C <sub>18</sub> H <sub>30</sub>                                 | Low          | Others     |
| Benzene, (1,1-dimethylnonyl)-                                                 | C <sub>17</sub> H <sub>28</sub>                                 | Low          | Others     |
| Benzene, 1-ethyl-2,3-dimethyl-                                                | C <sub>10</sub> H <sub>14</sub>                                 | Low          | Others     |
| benzenemethanamine, N,N-bis(4-methylphenyl)-                                  | C <sub>21</sub> H <sub>21</sub> N                               | High         | Others     |
| Benzoic acid, 4-(4-butylcyclohexyl)-, 2,3-dicyano-4-ethoxyphenyl ester        | C <sub>27</sub> H <sub>30</sub> N <sub>2</sub> O <sub>3</sub>   | High         | Others     |
| Benzoic acid, 4-amino-, 4-acetoxy-2,2,6,6-tetramethyl-1-piperidinyl ester     | C <sub>18</sub> H <sub>26</sub> N <sub>2</sub> O <sub>4</sub>   | High         | Others     |
| Benzoic acid, 4-amino-, 4-hydroximino-2,2,6,6-tetramethyl-1-piperidinyl ester | C <sub>16</sub> H <sub>23</sub> N <sub>3</sub> O <sub>3</sub>   | High         | Others     |
| Benzoic acid, octyl ester                                                     | C <sub>15</sub> H <sub>22</sub> O <sub>2</sub>                  | Low          | Cosmetics  |
| Benzoic acid                                                                  | C <sub>7</sub> H <sub>6</sub> O <sub>2</sub>                    | Low          | Industrial |
| Benothiazole                                                                  | C <sub>7</sub> H <sub>5</sub> NS                                | High         | Industrial |
| Bioresmethrin                                                                 | C <sub>22</sub> H <sub>26</sub> O <sub>3</sub>                  | High         | Pesticide  |
| BMK glycidic acid                                                             | C <sub>10</sub> H <sub>10</sub> O <sub>3</sub>                  | High         | Industrial |
| Butyl citrate                                                                 | C <sub>18</sub> H <sub>32</sub> O <sub>7</sub>                  | High         | Industrial |
| Carbaryl                                                                      | C <sub>12</sub> H <sub>11</sub> NO <sub>2</sub>                 | High         | Pesticide  |
| Catechol                                                                      | C <sub>6</sub> H <sub>6</sub> O <sub>2</sub>                    | Low          | Industrial |
| cis-11-Eicosenamide                                                           | C <sub>20</sub> H <sub>39</sub> NO                              | High         | Others     |
| cis-8-Isopropylbicyclo[4.3.0]non-3-ene                                        | C <sub>12</sub> H <sub>20</sub>                                 | High         | Others     |
| cis-Carveol, O-(pentafluoropropionyl)-                                        | C <sub>13</sub> H <sub>15</sub> F <sub>5</sub> O <sub>2</sub>   |              |            |
| Citroflex 4                                                                   | C <sub>18</sub> H <sub>32</sub> O <sub>7</sub>                  | High         | Industrial |
| Cyclohexane, 1-(cyclohexylmethyl)-2-ethyl-, cis-                              | C <sub>15</sub> H <sub>28</sub>                                 | Intermediate | Others     |

|                                                                                                          |                                                               |              |                     |
|----------------------------------------------------------------------------------------------------------|---------------------------------------------------------------|--------------|---------------------|
| Cyclohexane, 1,1'-methylenebis-                                                                          | C <sub>13</sub> H <sub>24</sub>                               | Intermediate | Industrial          |
| Cyclohexanecarboxylic acid, 4-butyl-, 4-methoxyphenyl ester                                              | C <sub>18</sub> H <sub>26</sub> O <sub>3</sub>                | Low          | Others              |
| Cycloheximide                                                                                            | C <sub>15</sub> H <sub>23</sub> NO <sub>4</sub>               | High         | Pesticide           |
| Cyclopropanecarboxylic acid, 1-(phenylmethyl)-, 2,6-bis(1,1-dimethylethyl)-4-methylphenyl ester          | C <sub>26</sub> H <sub>34</sub> O <sub>2</sub>                | High         | Others              |
| Cyclopropanecarboxylic acid, 2-methyl-1-(phenylmethyl)-, 2,6-bis(1,1-dimethylethyl)-4-methylphenyl ester | C <sub>27</sub> H <sub>36</sub> O <sub>2</sub>                | High         | Others              |
| Decanedioic acid, dibutyl ester                                                                          | C <sub>18</sub> H <sub>34</sub> O <sub>4</sub>                | Low          | Industrial          |
| Dibenzoylmethane                                                                                         | C <sub>15</sub> H <sub>12</sub> O <sub>2</sub>                | High         | Industrial          |
| Didemethylisoproturon                                                                                    | C <sub>10</sub> H <sub>14</sub> N <sub>2</sub> O              | Low          | Pesticide           |
| Di-n-octyl phthalate                                                                                     | C <sub>24</sub> H <sub>38</sub> O <sub>4</sub>                | Low          | Industrial          |
| dl-7-Azatryptophan                                                                                       | C <sub>10</sub> H <sub>11</sub> N <sub>3</sub> O <sub>2</sub> | High         | Industrial          |
| DL-Alanine, N-methyl-N-(2-ethylhexyloxycarbonyl)-, heptadecyl ester                                      | C <sub>30</sub> H <sub>59</sub> NO <sub>4</sub>               | Low          | Others              |
| D-Panthenol                                                                                              | C <sub>9</sub> H <sub>19</sub> NO <sub>4</sub>                | High         | Medicine            |
| Eicosanoic acid, 2-(acetyloxy)-1-[(acetyloxy)methyl]ethyl ester                                          | C <sub>27</sub> H <sub>50</sub> O <sub>6</sub>                | Low          | Others              |
| Ethaneperoxoic acid, 1-cyano-1-[2-(2-phenyl-1,3-dioxolan-2-yl)ethyl]pentyl ester                         | C <sub>19</sub> H <sub>25</sub> NO <sub>5</sub>               | High         | Others              |
| Formetorex                                                                                               | C <sub>10</sub> H <sub>13</sub> NO                            | Low          | Medicine/Industrial |
| Fumaric acid, octyl pent-4-en-2-yl ester                                                                 | C <sub>17</sub> H <sub>28</sub> O <sub>4</sub>                | Low          | Others              |
| Furazan-3-carboxylic acid, 4-amino-, 2-(2,5-dimethylphenyl)-2-oxoethyl ester                             | C <sub>13</sub> H <sub>13</sub> N <sub>3</sub> O <sub>4</sub> | High         | Others              |
| Gabapentin                                                                                               | C <sub>9</sub> H <sub>17</sub> NO <sub>2</sub>                | High         | Medicine            |
| Glutaric anhydride                                                                                       | C <sub>5</sub> H <sub>6</sub> O <sub>3</sub>                  | High         | Industrial          |
| Glycine, N-(3-methyl-1-oxo-2-butenyl)-, methyl ester                                                     | C <sub>8</sub> H <sub>13</sub> NO <sub>3</sub>                | High         | Others              |
| Glycylglycine, N,N'-diethyl-N'-(2-methoxyethoxycarbonyl)-, propyl ester                                  | C <sub>15</sub> H <sub>28</sub> N <sub>2</sub> O <sub>6</sub> | High         | Others              |
| Heptanamide, N-phenyl-                                                                                   | C <sub>13</sub> H <sub>19</sub> NO                            | Low          | Industrial          |
| Hexa(methoxymethyl)melamine                                                                              | C <sub>15</sub> H <sub>30</sub> N <sub>6</sub> O <sub>6</sub> | High         | Industrial          |
| Hexacosane                                                                                               | C <sub>26</sub> H <sub>54</sub>                               | Low          | Industrial          |
| Hexadecanoic acid, 2-hydroxyethyl ester                                                                  | C <sub>18</sub> H <sub>36</sub> O <sub>3</sub>                | Low          | Cosmetics           |
| Hexanamide, 3,5,5-trimethyl-N-propyl-N-heptyl-                                                           | C <sub>19</sub> H <sub>39</sub> NO                            |              | Others              |
| Hexanamide, N-(2-phenylethyl)-N-tetradecyl-                                                              | C <sub>28</sub> H <sub>49</sub> NO                            |              |                     |

|                                                                                  |                                                                 |      |                              |
|----------------------------------------------------------------------------------|-----------------------------------------------------------------|------|------------------------------|
| Hinesol                                                                          | C <sub>15</sub> H <sub>26</sub> O                               | High | Medicine                     |
| Homoserine lactone 1-(dimethylamino)naphthalene-5-sulfonamide                    | C <sub>16</sub> H <sub>18</sub> N <sub>2</sub> O <sub>4</sub> S | High | Others                       |
| Hydrocinnamic acid                                                               | C <sub>9</sub> H <sub>10</sub> O <sub>2</sub>                   | Low  | Cosmetic                     |
| Isobutyl dehydroabietate                                                         | C <sub>24</sub> H <sub>36</sub> O <sub>2</sub>                  |      |                              |
| L-(-)-Arabitol                                                                   | C <sub>5</sub> H <sub>12</sub> O <sub>5</sub>                   | Low  | Industrial                   |
| L-Cysteinesulfinic acid                                                          | C <sub>3</sub> H <sub>7</sub> NO <sub>4</sub> S                 | High | Biological                   |
| L-Iditol                                                                         | C <sub>6</sub> H <sub>14</sub> O <sub>6</sub>                   | Low  | Industrial                   |
| Levulinic acid                                                                   | C <sub>5</sub> H <sub>8</sub> O <sub>3</sub>                    | Low  | Industrial                   |
| Linoelaidic acid                                                                 | C <sub>18</sub> H <sub>32</sub> O <sub>2</sub>                  | Low  | Medicine                     |
| L-Leucine, N-(3-methylbutyl)-, methyl ester                                      | C <sub>12</sub> H <sub>25</sub> NO <sub>2</sub>                 | High |                              |
| Metalaxyl                                                                        | C <sub>15</sub> H <sub>21</sub> NO <sub>4</sub>                 | Low  | Pesticide/Antibacterial drug |
| Metamfepramone                                                                   | C <sub>11</sub> H <sub>15</sub> NO                              | Low  | Medicine/drug                |
| Methyl salicylate                                                                | C <sub>8</sub> H <sub>8</sub> O <sub>3</sub>                    | Low  | Medicine                     |
| Monomethyl phthalate                                                             | C <sub>9</sub> H <sub>8</sub> O <sub>4</sub>                    | Low  | Industrial                   |
| N-(2,4-Dimethylphenyl)formamide                                                  | C <sub>9</sub> H <sub>11</sub> NO                               | Low  | Amitraz metabolite           |
| N'-(1,5-Dimethylpyrazol-4-ylsulfonyl)quinoline-2-carbohydrazide                  | C <sub>15</sub> H <sub>15</sub> N <sub>5</sub> O <sub>3</sub> S |      |                              |
| N-(1-Benzyl-2-methylpyrrolidin-3-yl)-5-chloro-2-methoxy-4-(methylamino)benzamide | C <sub>21</sub> H <sub>26</sub> ClN <sub>3</sub> O <sub>2</sub> | High | Medicine                     |
| N'-(2,2-Dimethylpropanoyl)-2,2-dimethyl-N-(naphthalen-1-yl)propanehydrazide      | C <sub>20</sub> H <sub>26</sub> N <sub>2</sub> O <sub>2</sub>   |      |                              |
| N,N-Diethylethanolamine                                                          | C <sub>6</sub> H <sub>15</sub> NO                               | Low  | Industrial                   |
| N,N'-Bis(2,6-dimethyl-6-nitrosohept-2-en-4-one)                                  | C <sub>18</sub> H <sub>30</sub> N <sub>2</sub> O <sub>4</sub>   | High | Others                       |
| Naphthalene, 1,2,3,4-tetrahydro-5,8-dimethyl-1-octyl-                            | C <sub>20</sub> H <sub>32</sub>                                 | Low  | Others                       |
| N-Behenoyl-5-hydroxytryptamine                                                   | C <sub>32</sub> H <sub>54</sub> N <sub>2</sub> O <sub>2</sub>   | High | Others                       |
| N-Benzylformamide                                                                | C <sub>8</sub> H <sub>9</sub> NO                                | Low  | Industrial                   |
| N-Methyl-N-methoxy-5,6,7,8-tetrahydro-1-naphthamide                              | C <sub>13</sub> H <sub>17</sub> NO <sub>2</sub>                 | Low  | Others                       |
| N-Methylcaprolactam                                                              | C <sub>7</sub> H <sub>13</sub> NO                               | High | Industrial                   |
| Nicotinuric acid                                                                 | C <sub>8</sub> H <sub>8</sub> N <sub>2</sub> O <sub>3</sub>     | High | Other                        |
| Normeperidine                                                                    | C <sub>14</sub> H <sub>19</sub> NO <sub>2</sub>                 | High | Other                        |
| NP-002089                                                                        | C <sub>15</sub> H <sub>22</sub> O <sub>3</sub>                  | High | Other                        |



|                                                                       |                                                               |              |                          |
|-----------------------------------------------------------------------|---------------------------------------------------------------|--------------|--------------------------|
| NP-012551                                                             | C <sub>8</sub> H <sub>8</sub> O <sub>4</sub>                  |              |                          |
| NP-012972                                                             | C <sub>14</sub> H <sub>24</sub> O <sub>3</sub>                | Intermediate | Industrial               |
| NP-022068                                                             | C <sub>8</sub> H <sub>12</sub> O <sub>5</sub>                 | High         | Other                    |
| Octadecanoic acid, 2-hydroxyethyl ester                               | C <sub>20</sub> H <sub>40</sub> O <sub>3</sub>                | Low          | Industrial               |
| Oleyl alcohol, methyl ether                                           | C <sub>19</sub> H <sub>38</sub> O                             | Low          | Others                   |
| Oxiranecarboxylic acid, 3-methyl-3-phenyl-, ethyl ester, cis-         | C <sub>12</sub> H <sub>14</sub> O <sub>3</sub>                | High         | Others                   |
| Panthenol                                                             | C <sub>9</sub> H <sub>19</sub> NO <sub>4</sub>                | High         | Medicine                 |
| PEG Monolaurate n5                                                    | C <sub>22</sub> H <sub>44</sub> O <sub>7</sub>                | High         | Other                    |
| PEG n5                                                                | C <sub>10</sub> H <sub>22</sub> O <sub>6</sub>                | High         | Industrial               |
| PEG n6                                                                | C <sub>12</sub> H <sub>26</sub> O <sub>7</sub>                | High         | Industrial               |
| PEG n7                                                                | C <sub>14</sub> H <sub>30</sub> O <sub>8</sub>                | High         | Industrial               |
| PEG n8                                                                | C <sub>16</sub> H <sub>34</sub> O <sub>9</sub>                | High         | Industrial               |
| Perillic acid                                                         | C <sub>10</sub> H <sub>14</sub> O <sub>2</sub>                | Low          | Medicine                 |
| Phenmetrazine                                                         | C <sub>11</sub> H <sub>15</sub> NO                            | High         | Medicine/drug/industrial |
| Phenylglyoxylic acid                                                  | C <sub>8</sub> H <sub>6</sub> O <sub>3</sub>                  | Low          | Industrial               |
| Phenylpyruvic acid                                                    | C <sub>9</sub> H <sub>8</sub> O <sub>3</sub>                  | Low          | Industrial               |
| Phosphinic amide, N,N-dimethyl-, bis(2-phenylhydrazino)-              | C <sub>14</sub> H <sub>20</sub> N <sub>5</sub> OP             | High         | Others                   |
| Phthaldialdehyde                                                      | C <sub>8</sub> H <sub>6</sub> O <sub>2</sub>                  | Low          | Industrial               |
| Phthalic acid, di-(1-hexen-5-yl) ester                                | C <sub>20</sub> H <sub>26</sub> O <sub>4</sub>                | Low          | Others                   |
| Phthalic acid, isohexyl 8-quinolinyl ester                            | C <sub>23</sub> H <sub>23</sub> NO <sub>4</sub>               | High         | Others                   |
| Phthalimide, N-(2-hydroxy-3-butyl)-                                   | C <sub>12</sub> H <sub>13</sub> NO <sub>3</sub>               | High         | Others                   |
| Phthalimidoacetic acid                                                | C <sub>10</sub> H <sub>7</sub> NO <sub>4</sub>                | High         | Others                   |
| PPG n5                                                                | C <sub>15</sub> H <sub>32</sub> O <sub>6</sub>                | High         | Industrial               |
| Propane, 2,2'-[methylenebis(oxy)]bis[2-methyl-                        | C <sub>9</sub> H <sub>20</sub> O <sub>2</sub>                 | Low          | Others                   |
| Propanoic acid, 2-(benzoylamino)-3-(benzoyloxy)-, 1-methylethyl ester | C <sub>20</sub> H <sub>21</sub> NO <sub>5</sub>               | Low          | Others                   |
| Propionamide, 3-cyclopentyl-N-(2-butyl)-N-nonyl-                      | C <sub>21</sub> H <sub>41</sub> NO                            |              |                          |
| Pyridine, 2-(bis[bis(diethylamino)phosphino]methyl)-6-methyl-         | C <sub>23</sub> H <sub>47</sub> N <sub>5</sub> P <sub>2</sub> | High         | Others                   |
| Pyrimethanil                                                          | C <sub>12</sub> H <sub>13</sub> N <sub>3</sub>                | High         | Pesticide                |

|                                                              |                                                                 |      |                      |
|--------------------------------------------------------------|-----------------------------------------------------------------|------|----------------------|
| Pyrimidine, 4,6-dimethoxy-5-acetyl-                          | C <sub>8</sub> H <sub>10</sub> N <sub>2</sub> O <sub>3</sub>    | High | Others               |
| Ricinine                                                     | C <sub>8</sub> H <sub>8</sub> N <sub>2</sub> O <sub>2</sub>     | High | Pesticide/Industrial |
| Salicylic acid                                               | C <sub>7</sub> H <sub>6</sub> O <sub>3</sub>                    | Low  | Medicine             |
| Sulfurous acid, hexyl nonyl ester                            | C <sub>15</sub> H <sub>32</sub> O <sub>3</sub> S                | High | Others               |
| Terephthalic acid, di(1-cyclopentylethyl) ester              | C <sub>22</sub> H <sub>30</sub> O <sub>4</sub>                  | Low  | Others               |
| Tetradecanamide                                              | C <sub>14</sub> H <sub>29</sub> NO                              | High | Industrial           |
| Tetradecanoic acid, 2-hydroxyethyl ester                     | C <sub>16</sub> H <sub>32</sub> O <sub>3</sub>                  | Low  | Others               |
| Tetranor-12(S)-HETE                                          | C <sub>16</sub> H <sub>26</sub> O <sub>3</sub>                  | Low  | Medicine             |
| trans-11-Tetradecenyl acetate                                | C <sub>16</sub> H <sub>30</sub> O <sub>2</sub>                  | Low  | Pesticide            |
| trans-3-Azido-1,2,3,4-tetrahydro-2-naphthyl methanesulfonate | C <sub>11</sub> H <sub>13</sub> N <sub>3</sub> O <sub>3</sub> S | Low  | Others               |
| trans-Cinnamic acid                                          | C <sub>9</sub> H <sub>8</sub> O <sub>2</sub>                    | Low  | Industrial           |
| Tributyl acetylcitrate                                       | C <sub>20</sub> H <sub>34</sub> O <sub>8</sub>                  | Low  | Medicine             |
| Triethanolamine                                              | C <sub>6</sub> H <sub>15</sub> NO <sub>3</sub>                  | Low  | Industrial/Cosmetics |
| Trimethyl-(2-phenoxyethoxyethyl)silane                       | C <sub>12</sub> H <sub>20</sub> O <sub>2</sub> Si               | High | Others               |
| Triisopropanolamine                                          | C <sub>9</sub> H <sub>21</sub> NO <sub>3</sub>                  | Low  | Industrial           |
| Tyrosol                                                      | C <sub>8</sub> H <sub>10</sub> O <sub>2</sub>                   | Low  | Other                |
| Vanillin                                                     | C <sub>8</sub> H <sub>8</sub> O <sub>3</sub>                    | Low  | Industrial           |
| Valpromide                                                   | C <sub>8</sub> H <sub>17</sub> NO                               | High | Medicine             |
| Vinyl caprylate                                              | C <sub>10</sub> H <sub>18</sub> O <sub>2</sub>                  | Low  | Industrial           |
| Vinyldimethyl(acetoxymethyl)silane                           | C <sub>7</sub> H <sub>14</sub> O <sub>2</sub> Si                | High | Others               |

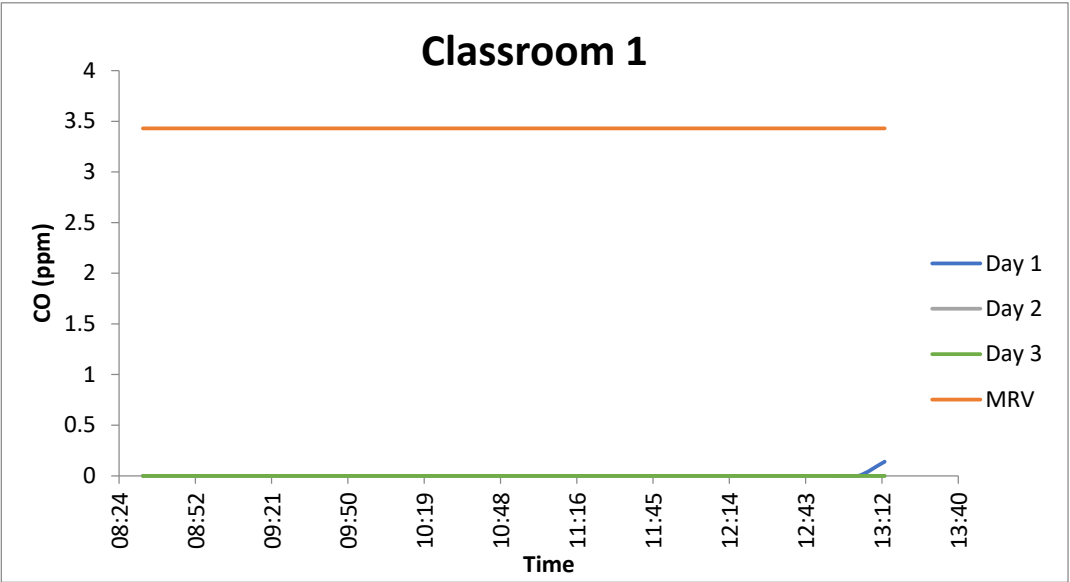

Figure S1. CO concentration (ppm) in classroom 1 (MRV = maximum recommended value).

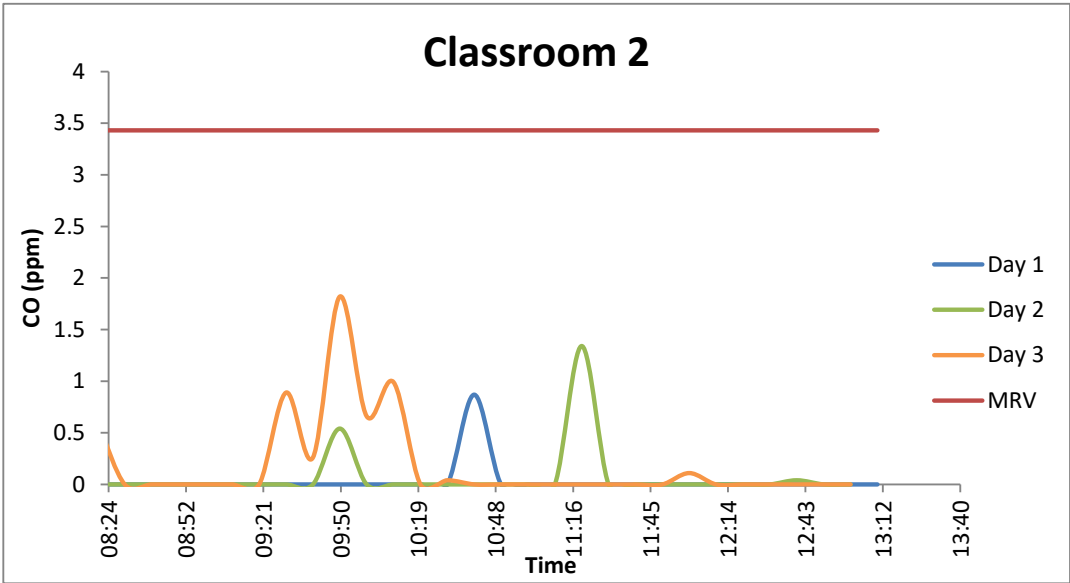

Figure S2. CO concentration (ppm) in classroom 2 (MRV = maximum recommended value).

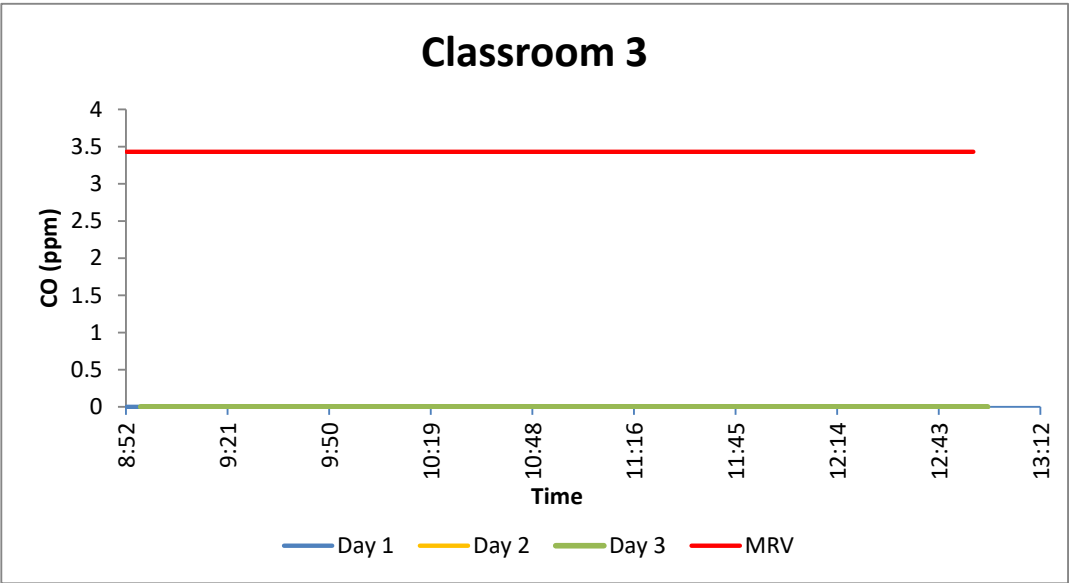

Figure S3. CO concentration (ppm) in classroom 3 (MRV = maximum recommended value).

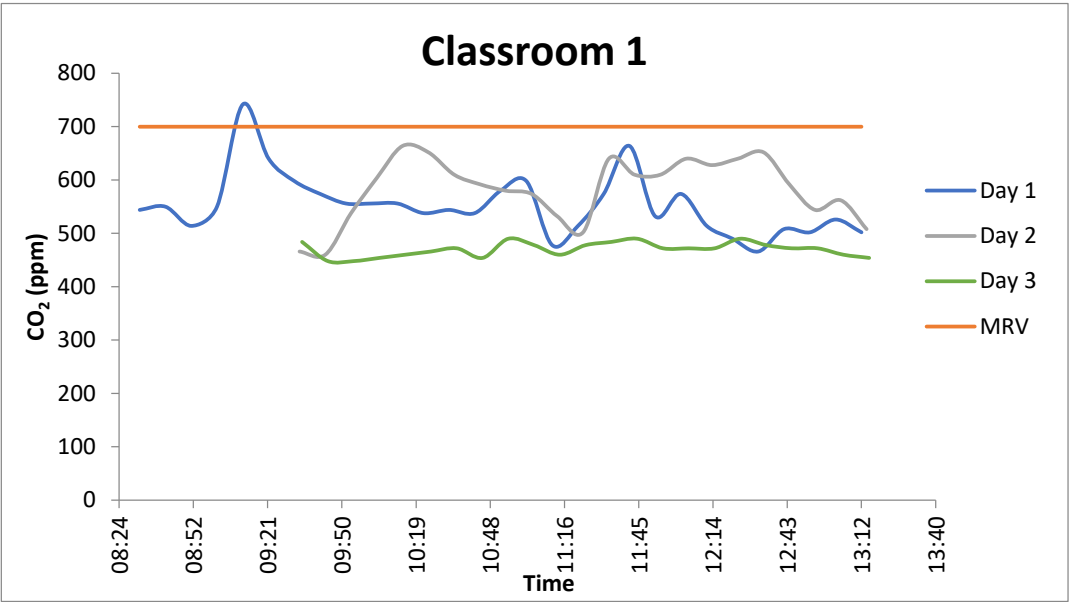

Figure S4. CO<sub>2</sub> concentration (ppm) in classroom 1 (MRV = maximum recommended value).

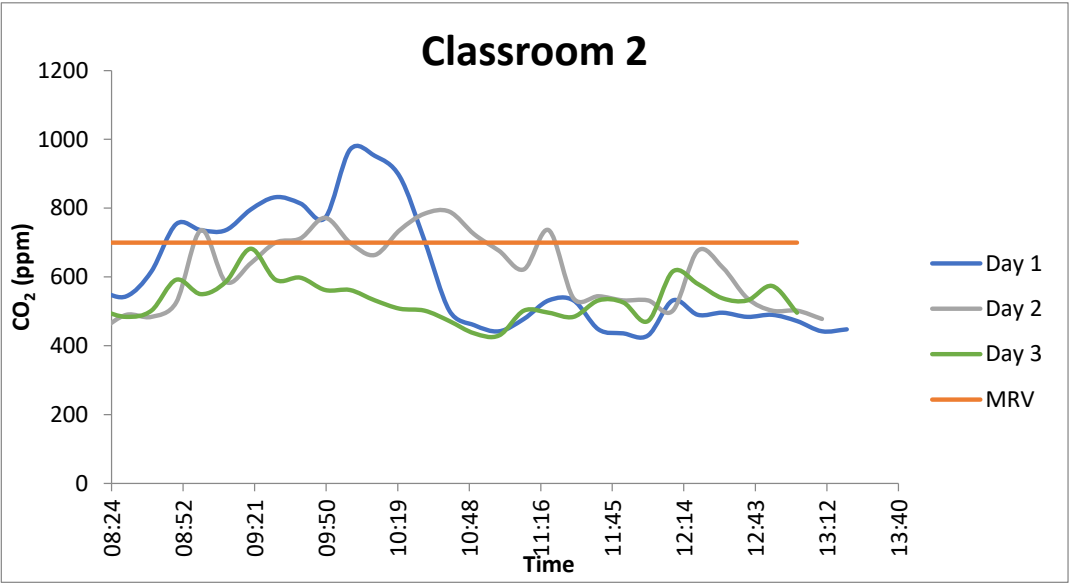

Figure S5. CO<sub>2</sub> concentration (ppm) in classroom 2 (MRV = maximum recommended value).

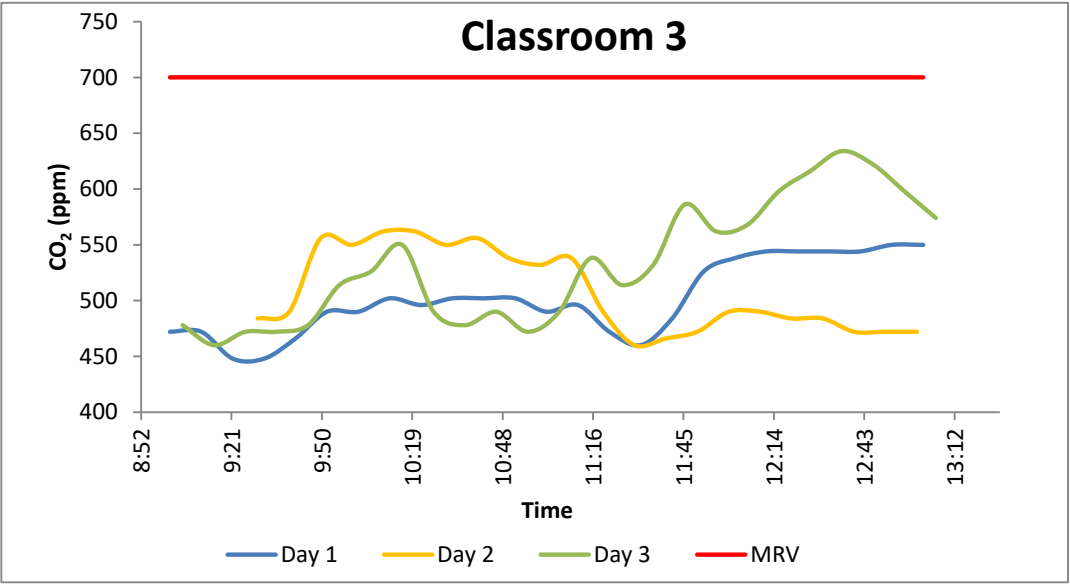

Figure S6. CO<sub>2</sub> concentration (ppm) in classroom 3 (MRV = maximum recommended value).



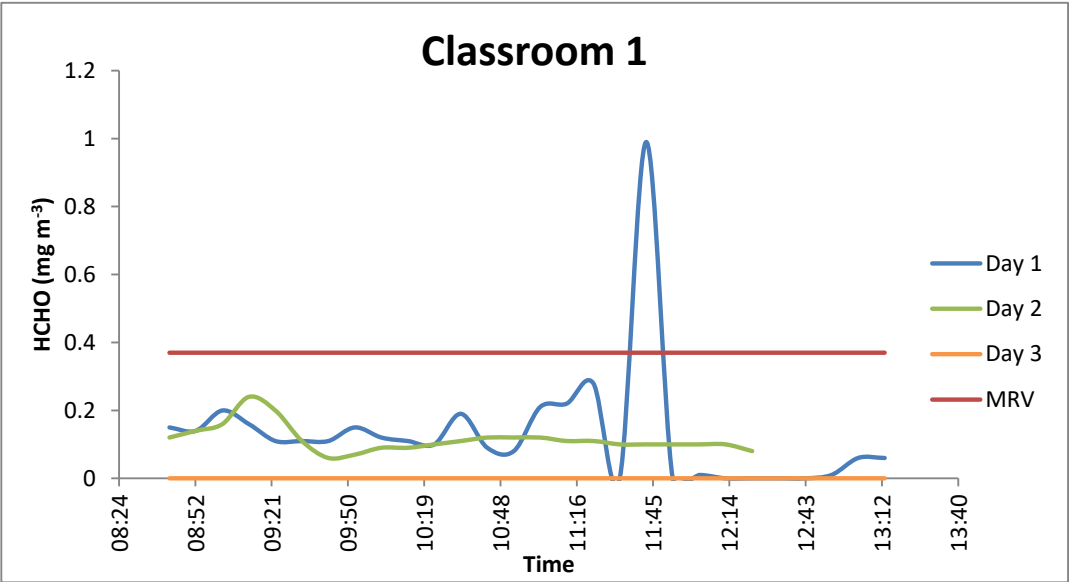

Figure S7. HCHO concentration ( $\text{mg m}^{-3}$ ) in classroom 1 (MRV = maximum recommended value).

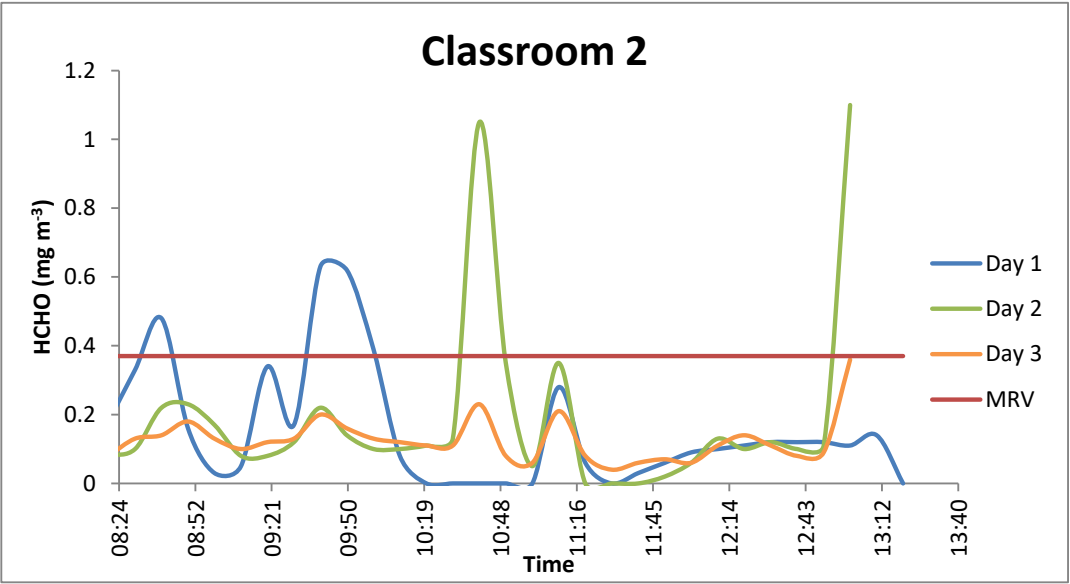

Figure S8. HCHO concentration ( $\text{mg m}^{-3}$ ) in classroom 2 (MRV = maximum recommended value).

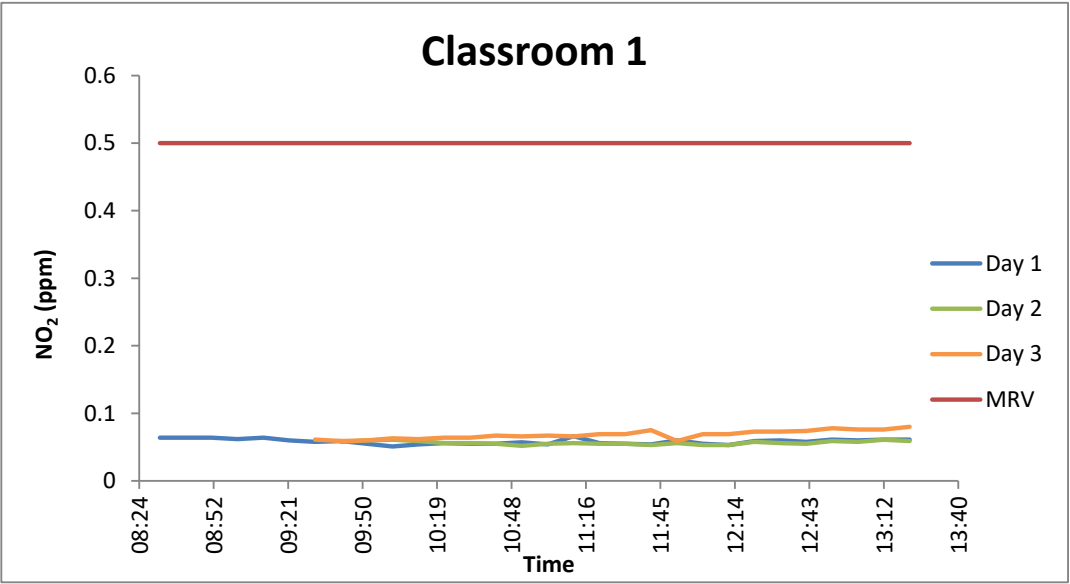

Figure S9. NO<sub>2</sub> concentration (ppm) in classroom 1 (MRV = maximum recommended value).

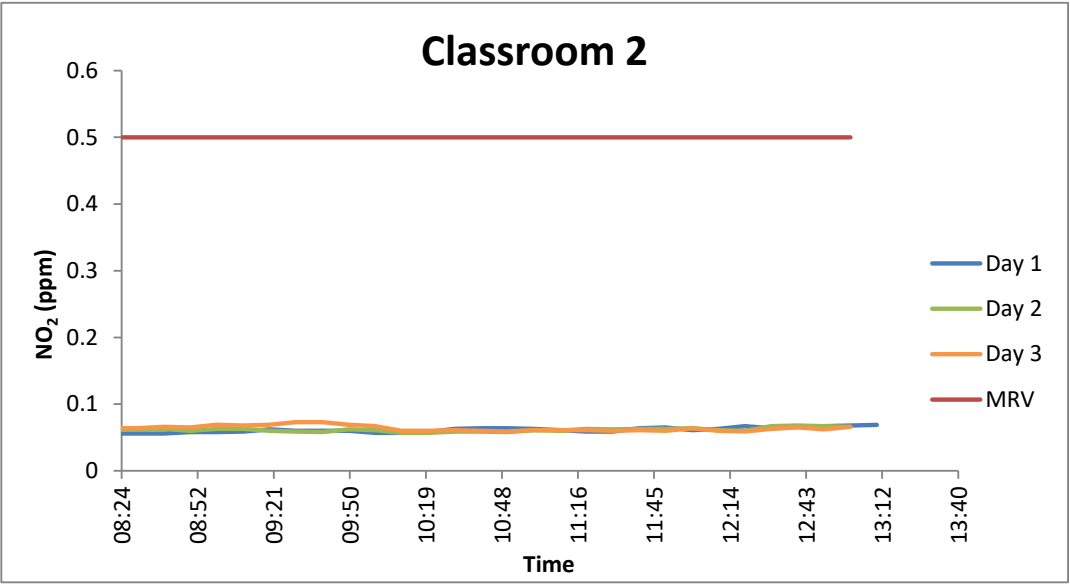

Figure S10. NO<sub>2</sub> concentration (ppm) in classroom 2 (MRV = maximum recommended value).

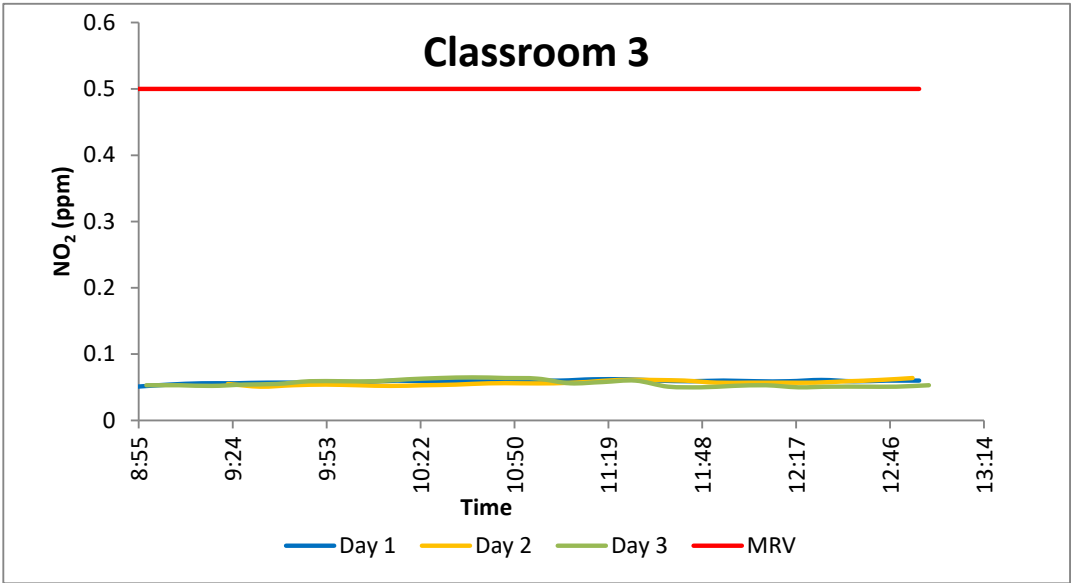

Figure S11. NO<sub>2</sub> concentration (ppm) in classroom 3 (MRV = maximum recommended value).

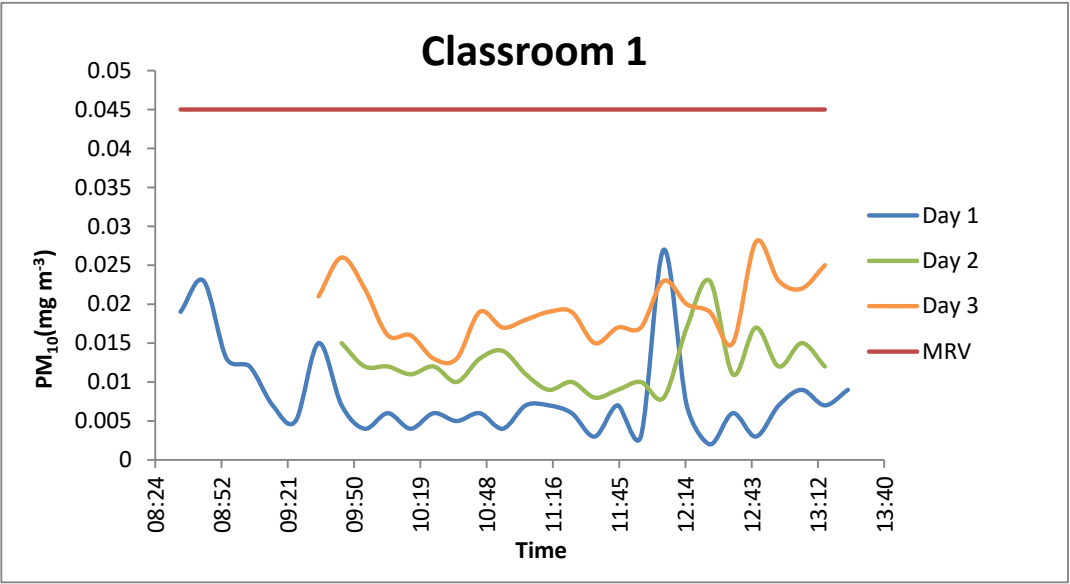

Figure S12. PM<sub>10</sub> concentration (mg m<sup>-3</sup>) in classroom 1 (MRV = maximum recommended value).

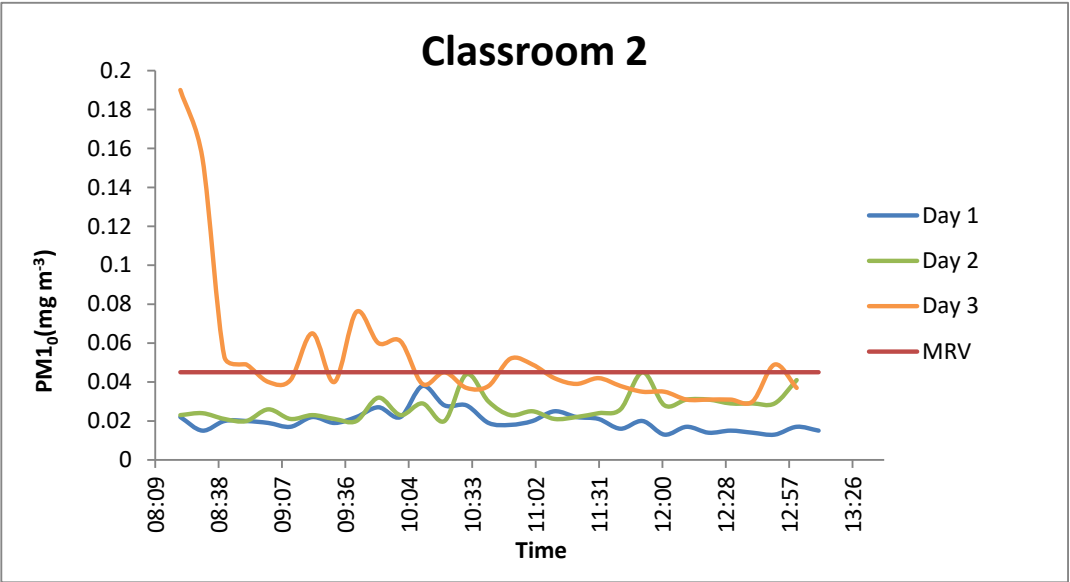

Figure S13. PM<sub>10</sub> concentration (mg m<sup>-3</sup>) in classroom 2 (MRV = maximum recommended value).

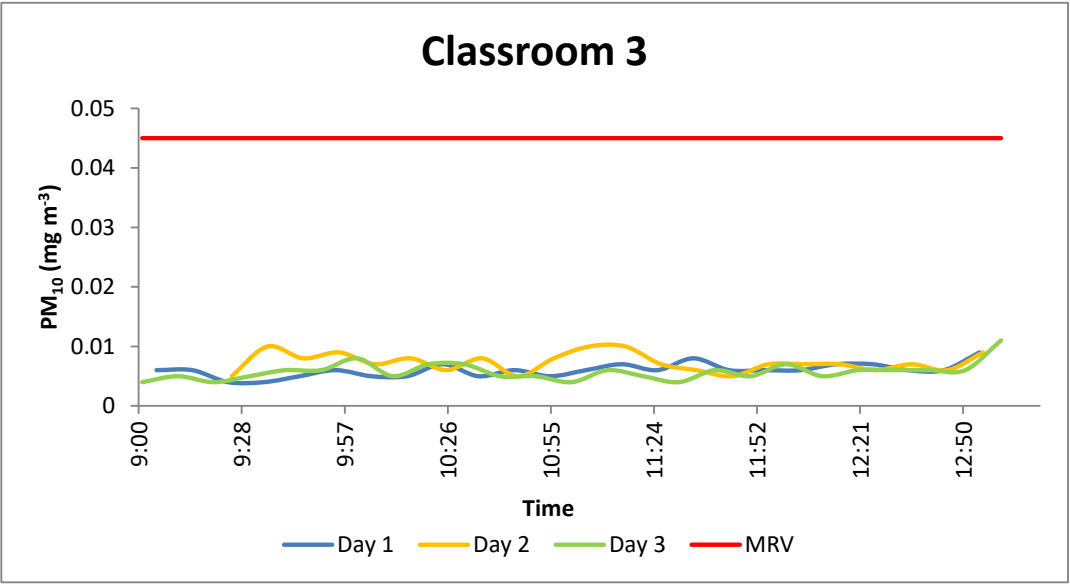

Figure S14. PM<sub>10</sub> concentration (mg m<sup>-3</sup>) in classroom 3(MRV = maximum recommended value).



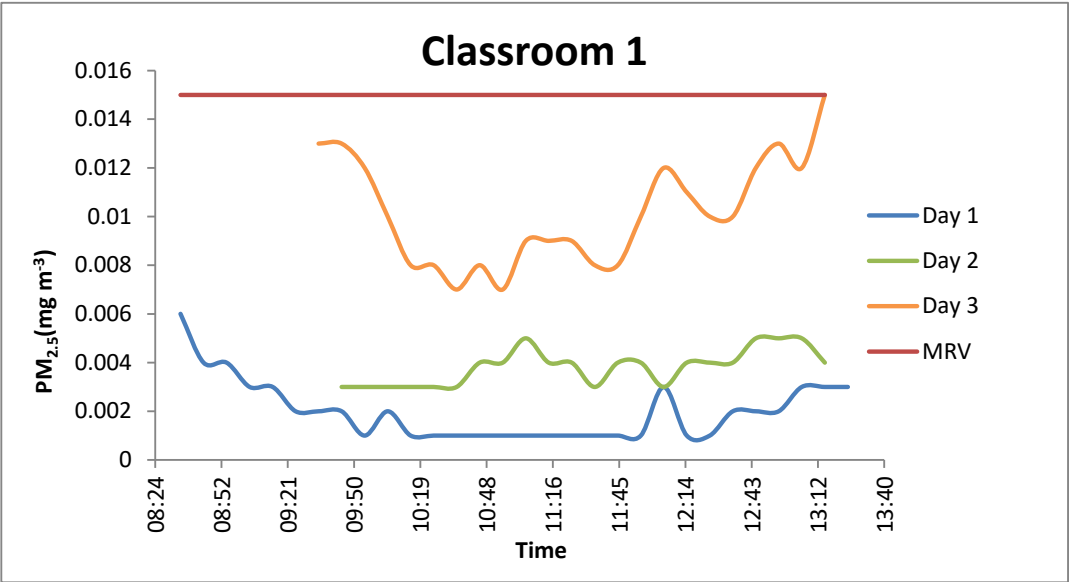

Figure S15. PM<sub>2.5</sub> concentration (mg m<sup>-3</sup>) in classroom 1 (MRV = maximum recommended value).

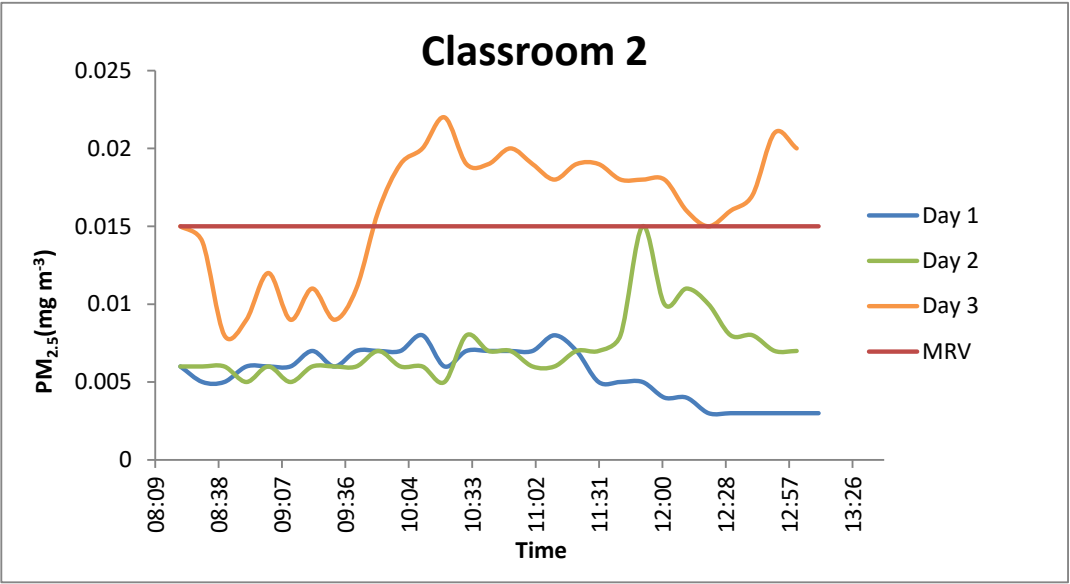

Figure S16. PM<sub>2.5</sub> concentration (mg m<sup>-3</sup>) in classroom 2 (MRV = maximum recommended value).

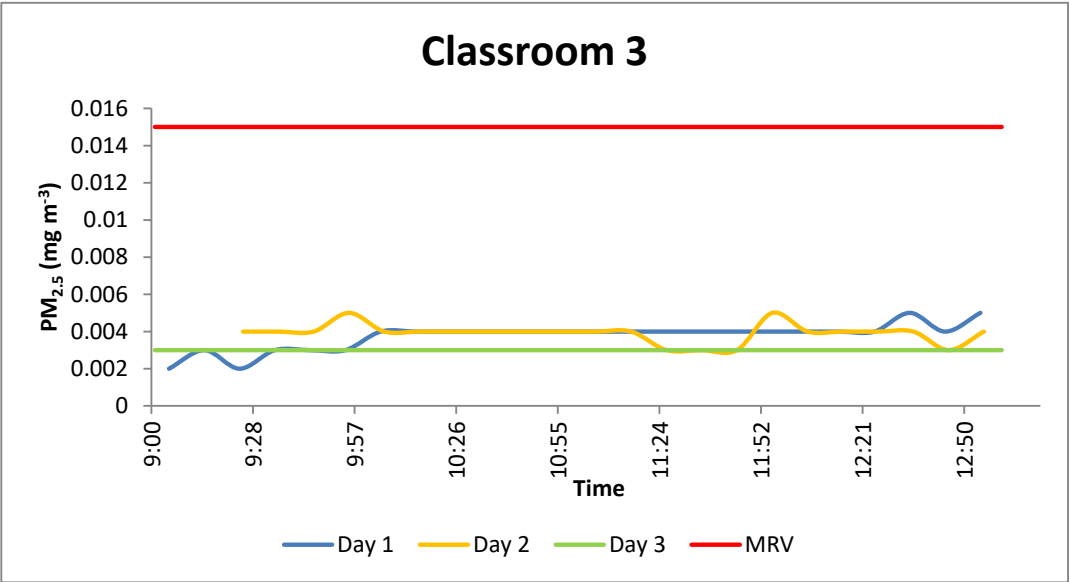

Figure S17. PM<sub>2.5</sub> concentration (mg m<sup>-3</sup>) in classroom 3 (MRV = maximum recommended value).

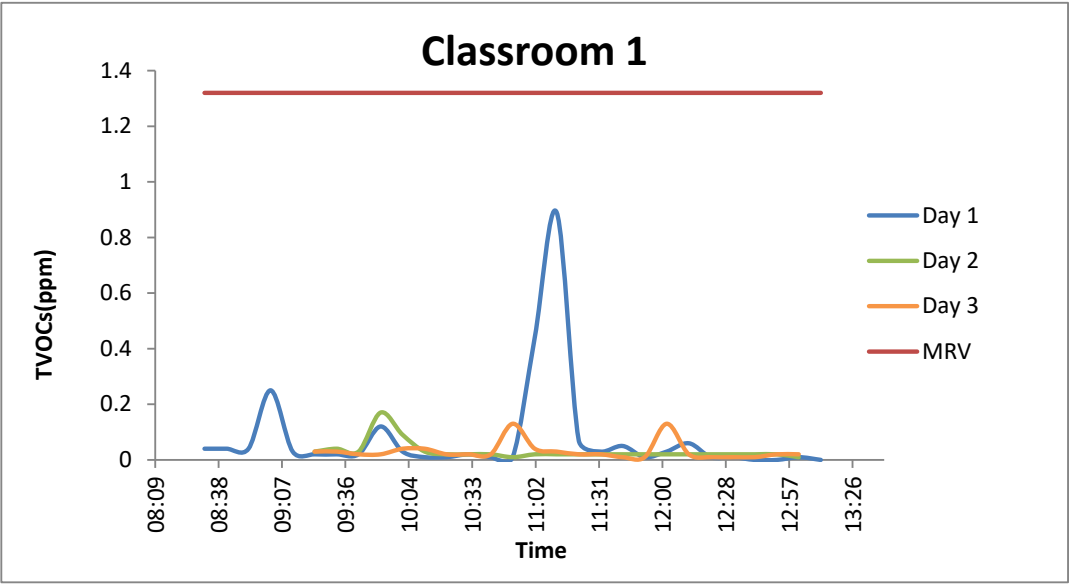

Figure S18. VOC concentrations (ppm) in classroom 1 (MRV = maximum recommended value).

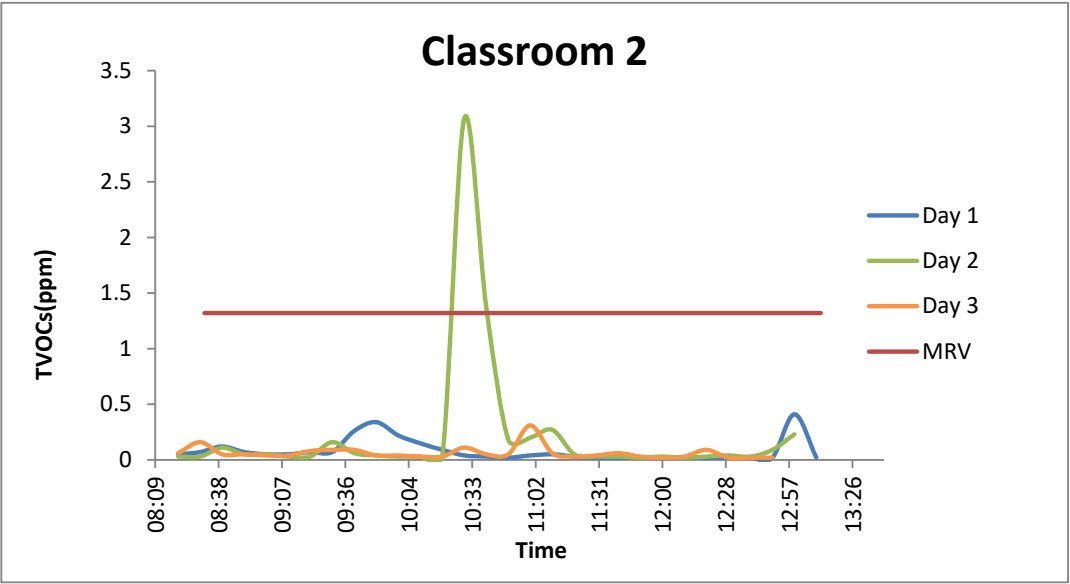

Figure S19. VOC concentrations (ppm) in classroom 2 (MRV = maximum recommended value).

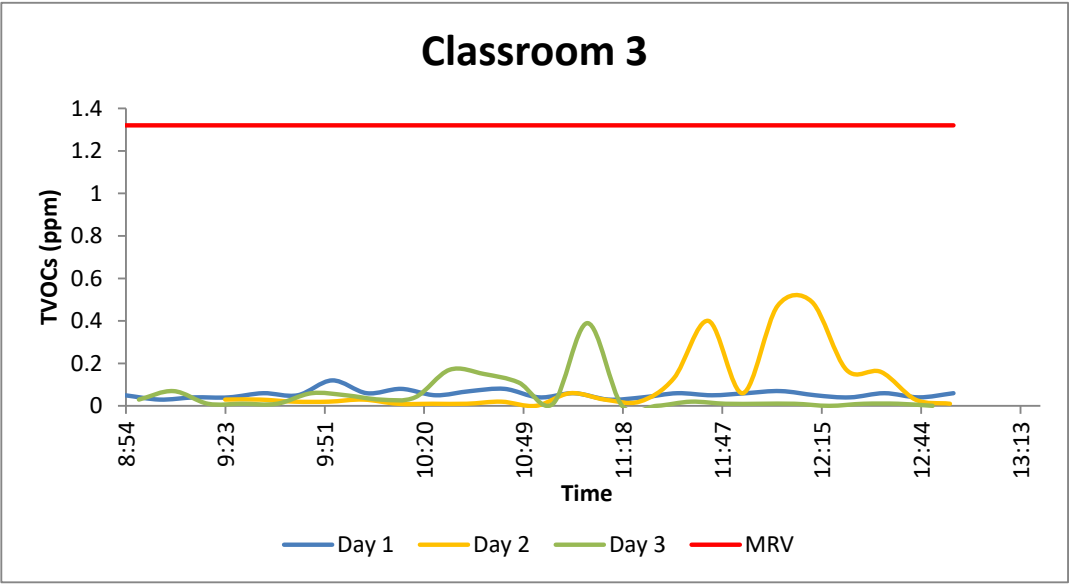

Figure S20. VOC concentrations (ppm) in classroom 3 (MRV = maximum recommended value).

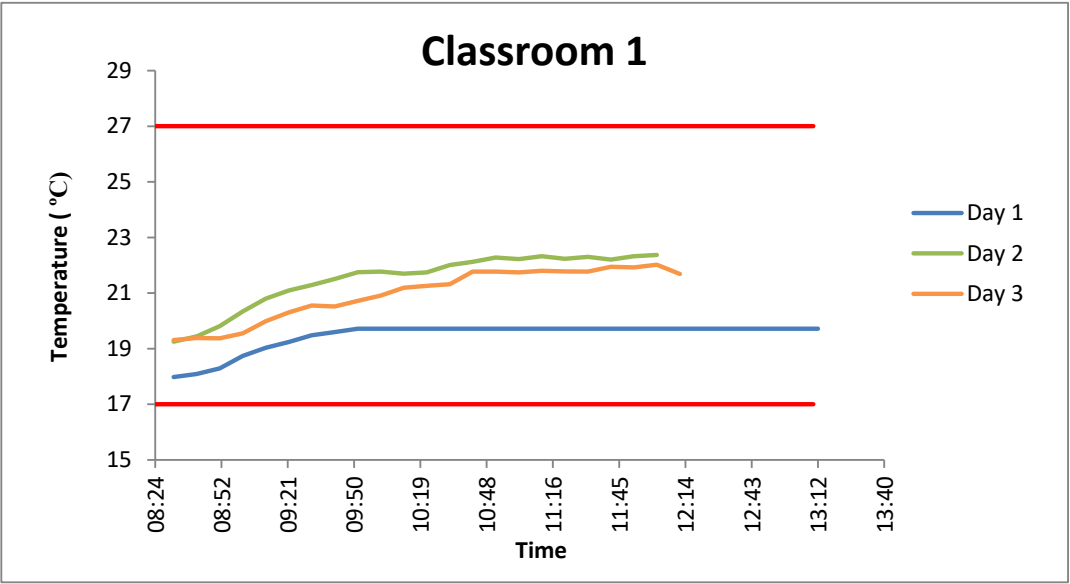

Figure S21. Temperature (°C) in classroom 1.

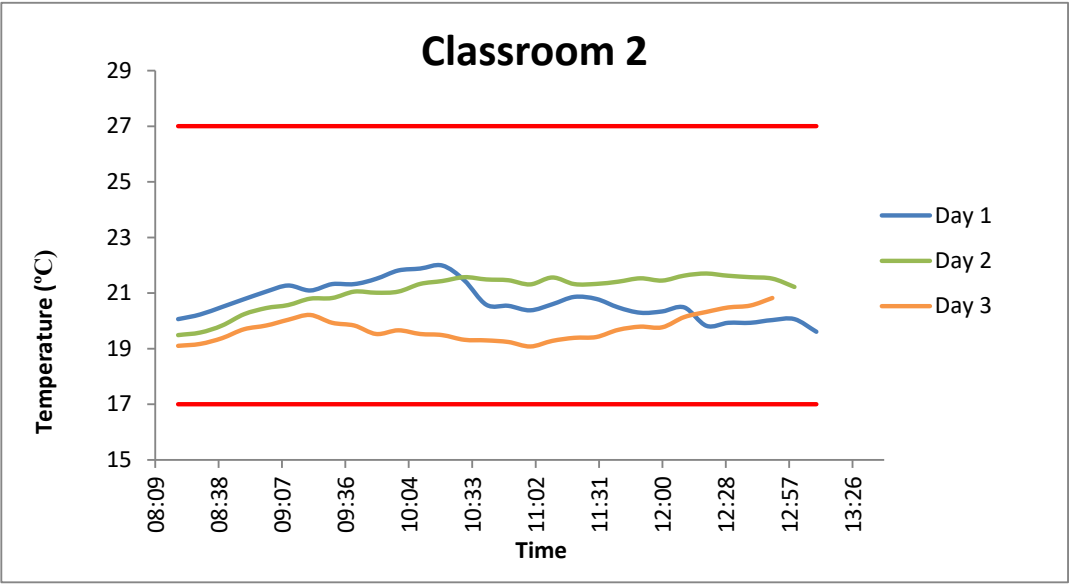

Figure S22. Temperature (°C) in classroom 2.



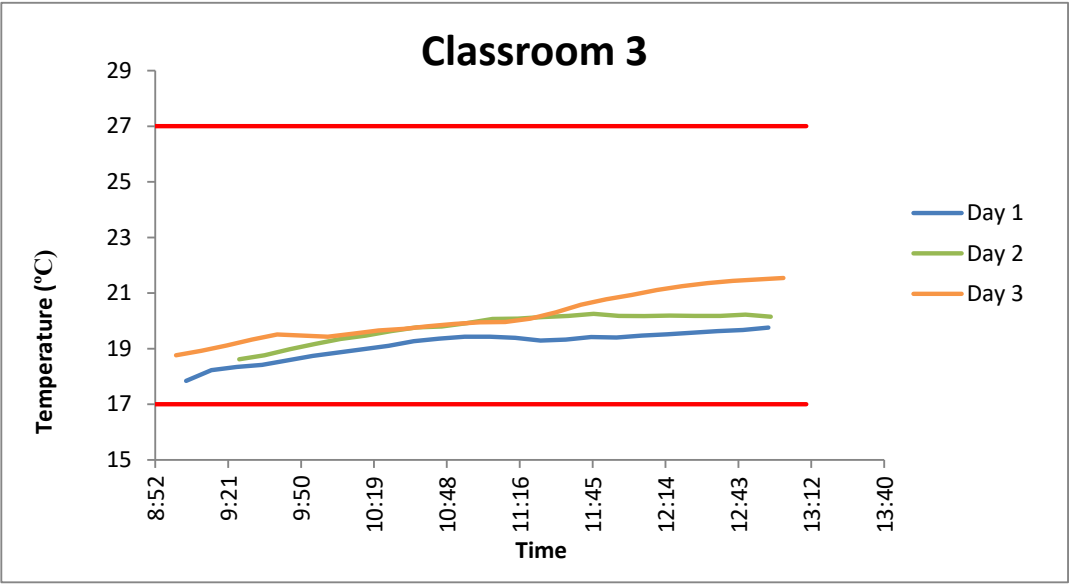

Figure S23. Temperature (°C) in classroom 3.

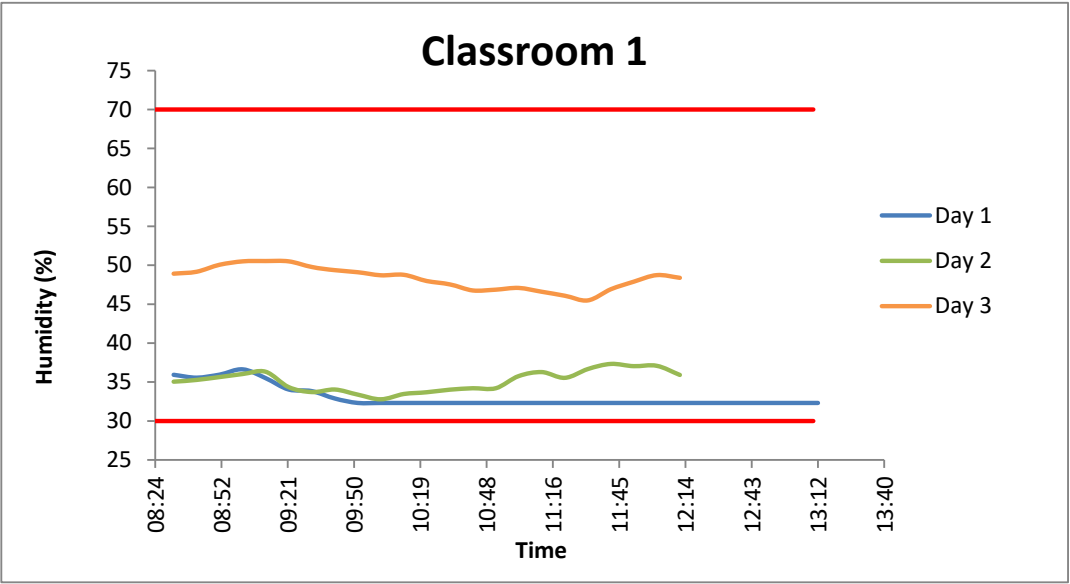

Figure S24. Relative Humidity (%) in classroom 1.

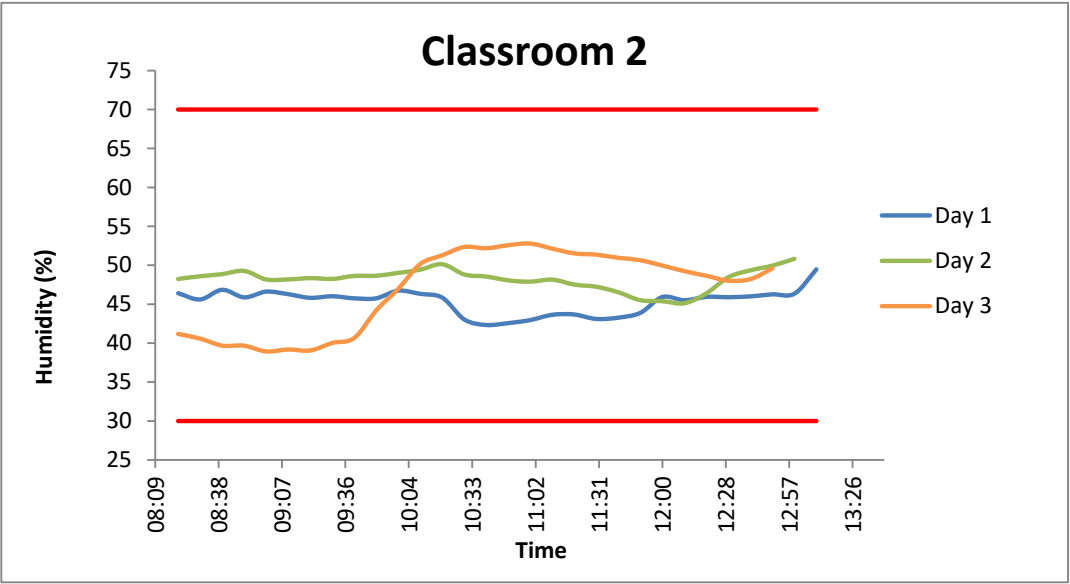

Figure S25. Relative humidity (%) in classroom 2.

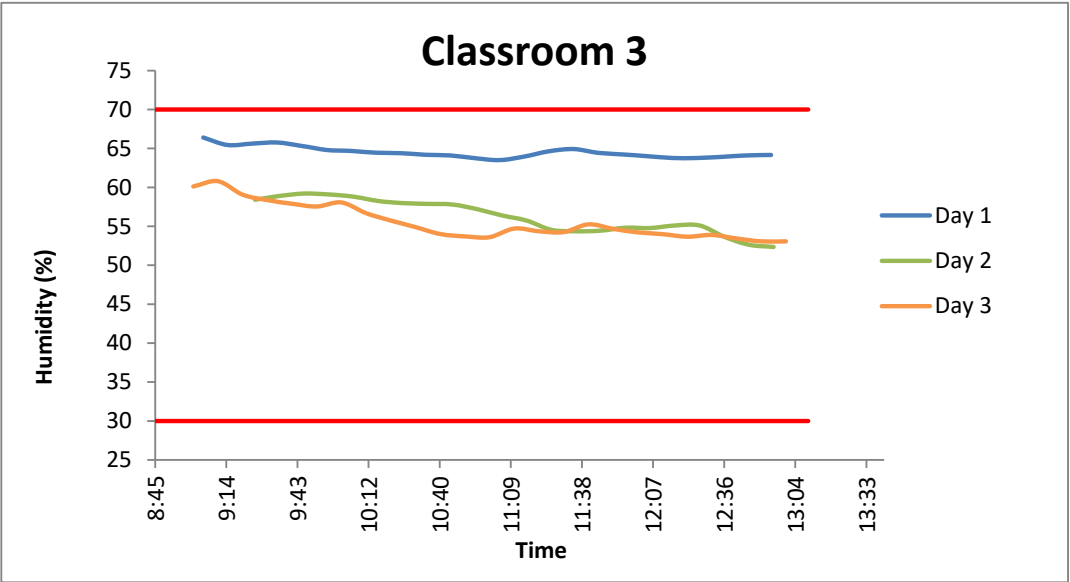

Figure S26. Relative humidity (%) in classroom 3.
